1 **A Systematic, Complexity-Reduction Approach to Dissect Microbiome: the**  
2 **Kombucha Tea Microbiome as an Example**

3

4 Xiaoning Huang<sup>1,2,3</sup>, Yongping Xin<sup>1,2</sup>, and Ting Lu<sup>1,2,4,5,6,\*</sup>

5 <sup>1</sup> Department of Bioengineering, University of Illinois Urbana-Champaign, Urbana, IL, USA

6 <sup>2</sup> Carl R. Woese Institute for Genomic Biology, University of Illinois Urbana-Champaign, Urbana,  
7 IL 61801, USA

8 <sup>3</sup> College of Food Science and Nutritional Engineering, China Agricultural University, Beijing  
9 100083, China

10 <sup>4</sup> Department of Physics, University of Illinois Urbana-Champaign, Urbana, IL, USA

11 <sup>5</sup> Center for Biophysics and Quantitative Biology, University of Illinois Urbana-Champaign,  
12 Urbana, IL 61801, USA

13 <sup>6</sup> National Center for Supercomputing Applications, Urbana, IL 61801, USA

14

15 \*Corresponding author. E-mail: [luting@illinois.edu](mailto:luting@illinois.edu)

16 **Abstract**

17 One defining goal of microbiome research is to uncover mechanistic causation that dictates the  
18 emergence of structural and functional traits of microbiomes. However, the extraordinary degree  
19 of ecosystem complexity has hampered the realization of the goal. Here we developed a  
20 systematic, complexity-reducing strategy to mechanistically elucidate the compositional and  
21 metabolic characteristics of microbiome by using the kombucha tea microbiome as an example.  
22 The strategy centered around a two-species core that was abstracted from but recapitulated the  
23 native counterpart. The core was convergent in its composition, coordinated on temporal  
24 metabolic patterns, and capable for pellicle formation. Controlled fermentations uncovered the  
25 drivers of these characteristics, which were also demonstrated translatable to provide insights  
26 into the properties of communities with increased complexity and altered conditions. This work  
27 unravels the pattern and process underlying the kombucha tea microbiome, providing a  
28 potential conceptual framework for mechanistic investigation of microbiome behaviors.

## 29 **Introduction**

30 Microbiome populates the planet Earth, driving the growth of plants<sup>1, 2</sup>, biogeochemical cycling  
31 of elements<sup>3, 4</sup>, and health and disease of humans<sup>5, 6</sup>. Over the past decades, microbiome has  
32 gained explosive interest across disciplines from both academia and industry. To date, most  
33 efforts have focused on species cataloging<sup>7</sup>, composition-phenotype association<sup>8,9</sup> and  
34 microbiome-environment correlation<sup>10</sup>. These efforts yielded invaluable insights into ecosystem  
35 structure and function, reinforcing the need for microbiome research. Moving forward, an  
36 overarching goal is to dissect microbiome causation and mechanism<sup>11, 12</sup>. Specifically, required  
37 to be uncovered are the causes of specific microbiome traits and underlying mechanisms that  
38 drive the emergence of these traits. Tackling this challenge is important, because it will help to  
39 understand community structure and dynamics, predict the impacts of microbiome on habitats  
40 and design interventions for modulating ecosystem function<sup>13, 14</sup>.

41 To achieve the goal, one promising path is to dissect the metabolic underpinnings of  
42 members constituting a microbiome. Metabolism is a defining cellular process through which  
43 microbes acquire nutrient and energy; thus, its characteristics determine the growth of individual  
44 species. Through metabolism, cells also produce substances that are beneficial or deleterious  
45 to the growth of other species. Additionally, metabolism is often accompanied with the  
46 production of biomolecules that are bioactive to habitats (e.g., human, soil and plant). These  
47 molecules directly affect habitats, for instance, short-chain fatty acids produced by the gut  
48 microbiome shape the immune function and brain behavior of human<sup>15-16</sup>. Alternatively, they  
49 may remodel the physiochemical properties of the habitats, through which microbiome realizes  
50 indirect functional modulation. For example, extracellular polysaccharides secreted by probiotic  
51 bacteria trigger biofilm formation in the gastrointestinal tract, which promotes the host'  
52 resistance to infection<sup>17</sup>. Thereby, targeting microbial metabolic underpinnings offers a  
53 systematic route to decode microbiome composition and function.

54 The pursuit of this path is, however, hindered by the intrinsic, remarkable complexity of

55 native ecologies. For instance, the human gut microbiome consists of over 1,000 species and  
56 100 trillion cells<sup>18</sup>; a teaspoon of healthy soil contains over 10,000 taxa members totaling up to 1  
57 billion cells<sup>19</sup>. To circumvent the challenge, researchers have recently turned to microbiome  
58 cores<sup>20-22</sup>, simplified communities that are abstracted from native ecosystems but retaining their  
59 key structural and functional characteristics. Supporting the notion, studies have revealed a core  
60 gut microbiome across human population regardless of body weight<sup>23</sup>. Additionally, across soda  
61 lakes separated in distance, there is a collection of common microbes with similar structural  
62 patterns<sup>24</sup>. These simplified systems are approximations of native communities, providing a  
63 powerful alternative to study complex ecosystems.

64 Here we hypothesize to interrogate metabolic underpinnings of minimal cores as a causal  
65 and mechanistic strategy to elucidate microbiome structure and function. To test the hypothesis,  
66 we adopted the kombucha tea (KT) microbiome as our model ecosystem. Commonly called a  
67 symbiotic culture of bacteria and yeasts (SCOBY)<sup>25</sup>, the microbiome drives the fermentation of  
68 KT, a slightly sweet, acidic beverage with multiple health benefits<sup>26, 27</sup>. During the fermentation,  
69 the microbiome also produces floating pellicles at the air-liquid interface<sup>28</sup>. Compared to  
70 microbial ecologies in the soil and the human body, the KT microbiome is relatively simple in  
71 composition, easy to cultivate and amendable for quantification. Additionally, it involves species  
72 that are well characterized and feasible for perturbations. In fact, food microbiomes including  
73 those in kefir grain<sup>29</sup>, cheese rind<sup>30-33</sup>, wine<sup>34</sup> and kimchi<sup>35</sup> have been lately exploited as  
74 tractable platforms for studying community diversity, succession and niche partition<sup>36</sup>.

75 Our specific research started by characterizing the composition and metabolite patterns of  
76 the microbiome from commercially available KT drinks. We then used isolates to assemble 25  
77 two-species consortia from which a minimal core was identified. Temporal fermentation showed  
78 that the core was convergent in its population composition, coordinated on temporal patterns of  
79 metabolites and capable of pellicle formation. Through comprehensive culturing of individual  
80 species under defined substrates, we obtained a casual and mechanistic understanding for the

81 observed structural and functional traits of the core. We further showed that the knowledge from  
82 the core was translatable to account for the properties of communities with increased complexity  
83 and altered conditions. Together, our work illustrates the pattern and process underlying the  
84 composition and function of the KT microbiome, providing a promising conceptual framework for  
85 mechanistic investigation of microbiome behaviors.

86

## 87 **Results**

88 **Characterization of the native KT microbiome.** We set out to identify key structural and  
89 functional traits of the KT microbiome by performing fermentations with commercially available  
90 SCOBYs and black tea substrate supplemented with 50 g/L of sucrose (Methods). Each of the  
91 fermentations resulted in a light-brown broth and a floating, gel-like pellicle (Fig. 1a), which were  
92 analyzed in terms of their compositional diversity and metabolite abundance using amplicon  
93 sequencing and high-performance liquid chromatography respectively. Here, we considered  
94 metabolite profiles as a representation of microbiome function because chemical ingredients in  
95 KT broth are key factors conferring benefits<sup>25, 27</sup>.

96 Our results showed that the microbiome had a relative low diversity, dominated by four  
97 bacterial genera, namely *Komagataeibacter*, *Acetobacter*, *Gluconobacter* and *Pseudomonas*  
98 (Fig. 1b), and three fungal genera including *Brettanomyces*, *Pichia* and *Zygosaccharomyces*  
99 (Fig. 1c). The bacteria and fungi also exhibited different context dependences: the composition  
100 of the former could vary significantly between the broth and pellicle of a single KT sample, such  
101 as samples A and C (AB (sample A's broth) vs. AP (sample A's pellicle), CB vs. CP) (Fig. 1b); by  
102 contrast, the composition of the latter remained consistent across broth and pellicle (Fig. 1c).  
103 Additionally, for bacteria, *Komagataeibacter* was the overall most predominant genus across  
104 samples and other genera were prevalent only in selected cases. For example, *Acetobacter*  
105 was prevalent in BB and BP, *Gluconobacter* was dominant in AB and *Pseudomonas* was  
106 predominant in CB. For fungi, *Brettanomyces* was predominant in all samples but, in samples B

107 and *C. Pichia* and *Zygosaccharomyces* were also widespread. Thus, bacteria and fungi both  
 108 served as constituting members of the microbiome, with *Komagataeibacter* and *Brettanomyces*  
 109 being the dominant bacterial and fungal genus accordingly. This compositional pattern was  
 110 consistent with previous reports although *Pseudomonas* was typically low in abundance<sup>37-38</sup>.  
 111

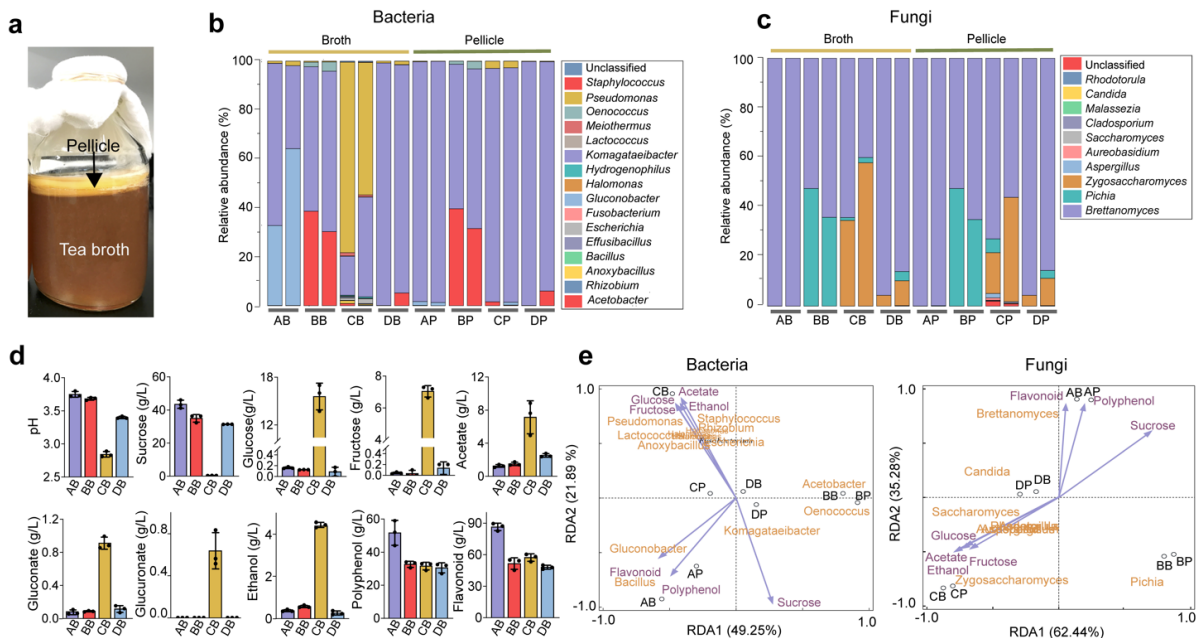

112  
 113 **Figure 1. Characterization of the native KT microbiome.** **a** Image of a typical kombucha tea  
 114 fermentation containing both broth and pellicle. **b, c** Microbial composition in the broths and  
 115 pellicles of different kombucha teas at the bacterial (**b**) and fungal (**c**) genus levels. For the four  
 116 tea samples (A, B, C and D), their broths are named AB, BB, CB and DB whereas their pellicles  
 117 are called AP, BP, CP and DP respectively. For each sample, two duplicates are presented. **d**  
 118 Chemical properties of the kombucha tea broths. Measured variables include pH, sucrose,  
 119 glucose, fructose, acetate, gluconate, glucuronate, ethanol, polyphenol and flavonoid. Bars and  
 120 error bars correspond to means and s.d. **e** Correlation between microbial composition with  
 121 biochemical substances in the KTs uncovered by redundancy analysis. Purple arrows represent  
 122 metabolites, black circles represent different tea samples.

123

124 In parallel, we quantified the biochemical characteristics of KT broths, including pH, sugars,  
125 acids and tea-derived substances (Fig. 1d). The final pH values of samples A, B, D were around  
126 3.6 while the pH of sample C was 2.8, all of which were in the reported range of a matured KT  
127 safe for human consumption<sup>39</sup>. The sucrose concentration dropped from 50 g/L to 30-40 g/L  
128 except for sample C whose sucrose was depleted. There were also trace amounts of glucose  
129 and fructose except for sample C containing a high level of the sugars. Acetate, gluconate and  
130 glucuronate were also detected, among which acetate had the highest concentration. Again,  
131 sample C was the outlier with a much higher level of acids. Since the concentration of gluconate  
132 was relatively low in our experiment and varied greatly across previous studies<sup>26,40</sup>, we would  
133 not consider it as a characteristic metabolite. The fermentation also resulted in the accumulation  
134 of ethanol (~0.5 g/L for samples A, B and D and 4.4 g/L for sample C). Two tea-derived  
135 compounds, polyphenol and flavonoid, were abundant (~30 g/L and ~50 g/L respectively). To  
136 reveal how these metabolites correlate with microbial composition, we performed redundancy  
137 analysis over the four samples (Fig. 1e).

138 From the above results, we drew three traits as the defining characteristics of the KT  
139 microbiome: first, it involves both bacteria and yeasts; second, it consumes sucrose with the  
140 synthesis of acetate, ethanol and a low level of glucose and fructose as the primary extracellular  
141 metabolites; third, it results in pellicle formation. These traits serve as the criteria for the  
142 identification of a proper microbiome core.

143

144 **Selection of a minimal core for the KT microbiome.** To develop a correct core that  
145 recapitulates the native microbiome, we isolated a series of strains from the KT samples  
146 (Supplementary Tables 1,2). From the isolates, we selected 5 bacterial species, including  
147 *Komagataeibacter rhaeticus* (B<sub>1</sub>), *Komagataeibacter intermedius* (B<sub>2</sub>), *Gluconacetobacter*  
148 *europaeus* (B<sub>3</sub>), *Gluconobacter oxydans* (B<sub>4</sub>) and *Acetobacter senegalensis* (B<sub>5</sub>), and 5 fungal

149 species, including *Brettanomyces bruxellensis* (Y<sub>1</sub>), *Zygosaccharomyces bailii* (Y<sub>2</sub>), *Candida*  
150 *sake* (Y<sub>3</sub>), *Lachancea fermentati* (Y<sub>4</sub>) and *Schizosaccharomyces pombe* (Y<sub>5</sub>), for synthesizing  
151 microbiome cores. Guided by the criterium that the KT microbiome contains both bacteria and  
152 fungi, we performed combinatorial mixing of the selected isolates, resulting in 25 two-species  
153 minimal core candidates with each involving one bacterial and one fungal species. To determine  
154 whether these candidates resemble the native, we conducted KT fermentation with these  
155 candidates and their corresponding 10 monocultures and, subsequently, quantified their  
156 microbial composition, extracellular metabolites and pellicle formation (Methods).

157 From colony forming units (CFU) counting (Fig. 2a), we found the bacterial and fungal  
158 species coexisted in all co-cultures as in the native KT microbiome. Additionally, in most cases,  
159 bacteria and yeasts had comparable relative abundances (<10 folds of difference) except for the  
160 combinations B<sub>2</sub>Y<sub>3</sub> and B<sub>4</sub>Y<sub>3</sub> whereby the bacteria were 100 times less than the yeast,  
161 suggesting these two combinations might not be the best candidates. For monocultures, the  
162 bacteria showed highly variable CFU while the yeasts yielded comparable CFU, indicating that  
163 bacteria varied greatly in sucrose utilization while yeasts were all stably capable.

164 By measuring pH, sugars, acids and tea-derived substances in the broths, we also  
165 obtained the biochemical characteristics of the candidates (Fig. 2b and Supplementary Table 3).  
166 The results showed that the co-cultures had comparable pH (~ 3.5) except for the five involving  
167 Y<sub>3</sub>. The Y<sub>3</sub>-involving candidates also yielded a significantly higher level of residual sucrose and  
168 a significantly lower level of acetate and ethanol compared to others, suggesting that these  
169 candidates were unsuitable to serve as cores. The metabolite profiles of the monocultures  
170 showed that the yeasts alone could be sufficient for sucrose consumption. It also showed that  
171 acetate was produced primarily through co-cultures but not monocultures. To systematically  
172 evaluate the candidates, we performed hierarchical cluster analysis and principal component  
173 analysis over the metabolites to determine the similarities among the candidates and the four  
174 native samples (AB, BB, CB and DB). The hierarchical cluster analysis yielded three groups,



175 one involving bacteria monocultures and Y<sub>3</sub>-involved mono- and co-cultures, another containing  
 176 CB only, and the third including the rest (Fig. 2c). The principal component analysis showed that  
 177 the co-cultures were all relatively close to the native microbiomes except for CB (Fig. 2d).

178 We further evaluated the candidates in terms of pellicle formation, the third characteristic  
 179 of the native microbiome. The results showed that five co-cultures, B<sub>2</sub>Y<sub>1</sub>, B<sub>2</sub>Y<sub>2</sub>, B<sub>2</sub>Y<sub>3</sub>, B<sub>2</sub>Y<sub>4</sub> and  
 180 B<sub>2</sub>Y<sub>5</sub>, successfully produced pellicles during sucrose fermentation (data not shown).

181 Combining all three aspects of consideration, we chose B<sub>2</sub>Y<sub>1</sub> as our minimal core of the KT  
 182 microbiome for systematic, mechanistic investigation. Notably, Y<sub>1</sub> (*B. bruxellensis*) was also the  
 183 most predominant yeast species in the native samples (Fig. 1c and Supplementary Table 2).

184

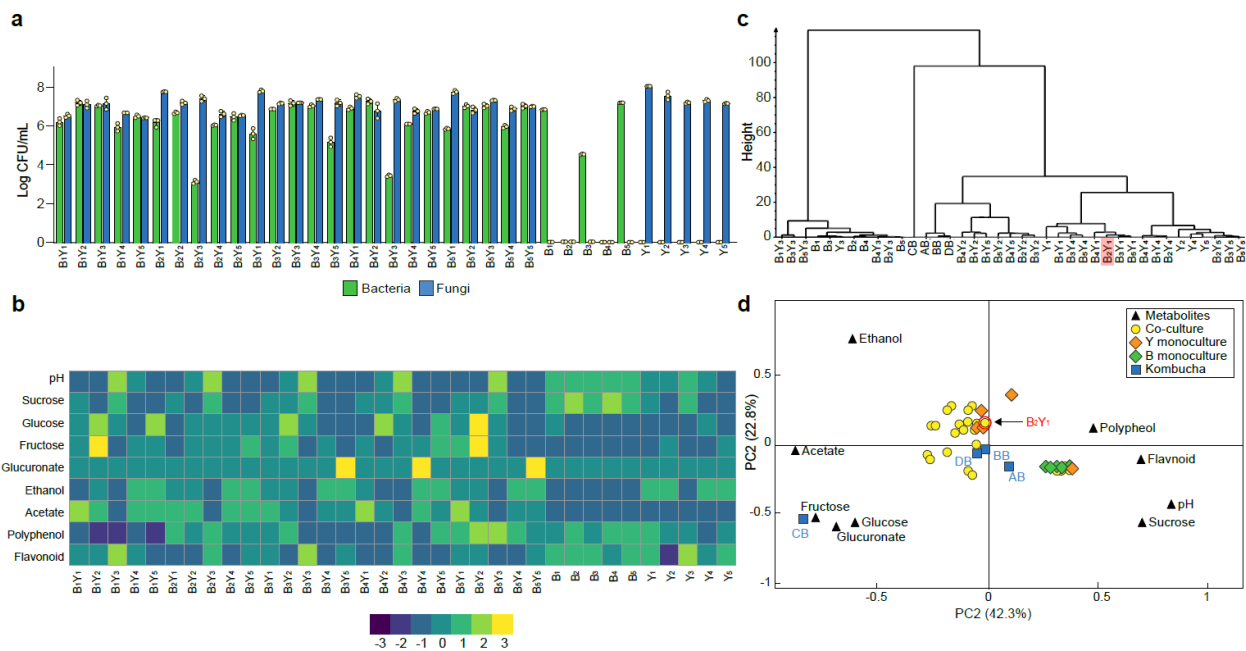

185

186 **Figure 2. Population and metabolic quantification of two-species core candidates. a**

187 Colony forming units (CFU) counting of 25 two-species core candidates and 10 monoculture  
 188 controls upon fermentation. Each core candidate is composed of one bacterial and one fungal  
 189 species selected from the 10 isolates: B<sub>1</sub> (*Komagataeibacter rhaeticus*), B<sub>2</sub> (*Komagataeibacter*  
 190 *intermedius*), B<sub>3</sub> (*Gluconacetobacter europaeus*), B<sub>4</sub> (*Gluconobacter oxydans*), B<sub>5</sub> (*Acetobacter*

191 *senegalensis*),  $Y_1$  (*Brettanomyces bruxellensis*),  $Y_2$  (*Zygosaccharomyces bailii*),  $Y_3$  (*Candida*  
192 *sake*),  $Y_4$  (*Lachancea fermentati*), and  $Y_5$  (*Schizosaccharomyces pombe*). Each monoculture  
193 control is one of the ten isolates. **b** Chemical property analysis of the core candidates and their  
194 controls. Heatmap is scaled by the values for each row. Measured variables include pH, sucrose,  
195 glucose, fructose, glucuronate, ethanol, acetate, polyphenol and flavonoid. **c** Hierarchical cluster  
196 analysis of the metabolic properties of the samples. The candidate  $B_2Y_1$  is highlighted. **d**  
197 Principal component analysis of the metabolic properties. The candidate  $B_2Y_1$  is circled in red.

198  
199 **Compositional and metabolic dynamics of the core.** To reveal the detailed traits of the  
200 selected core ( $B_2Y_1$ ), we performed a set of fermentation experiments with different initial ratios  
201 (100:1, 10:1, 1:1, 1:10, and 1:100) while maintaining a constant total inoculation ( $2 \times 10^6$  CFU/mL)  
202 (Methods). For all initial conditions, we found the bacterium  $B_2$  decreased in day 1 but increased  
203 afterwards with a declining magnitude of the growth rate (Fig. 3a and Supplementary Fig. 1a).  
204 By contrast, the yeast  $Y_1$  monotonically grew up with its rate reducing to null over time (Fig. 3b,  
205 Supplementary Fig. 1b). The population ratio of the two species showed that the community  
206 composition converged throughout the course of fermentation despite the variation of its initial  
207 ratio (Fig. 3c).

208 The fermentation was also accompanied with the formation of pellicles (Supplementary Fig.  
209 1c), which became visible after day 6 and grew continuously afterwards. Our CFU counting  
210 showed that, once pellicle formed,  $B_2$  and  $Y_1$  population densities remained relatively stable in  
211 the pellicles regardless of their initial abundance (Supplementary Fig. 1d,e). Meanwhile, their  
212 ratio converged to a fixed value (Fig. 3d) although the dry weight of the pellicles increased over  
213 time (Supplementary Fig. 1f). The convergence of composition in both broth and pellicle  
214 suggested that there were underlying forces that drove and stabilized community population  
215 dynamics.

216

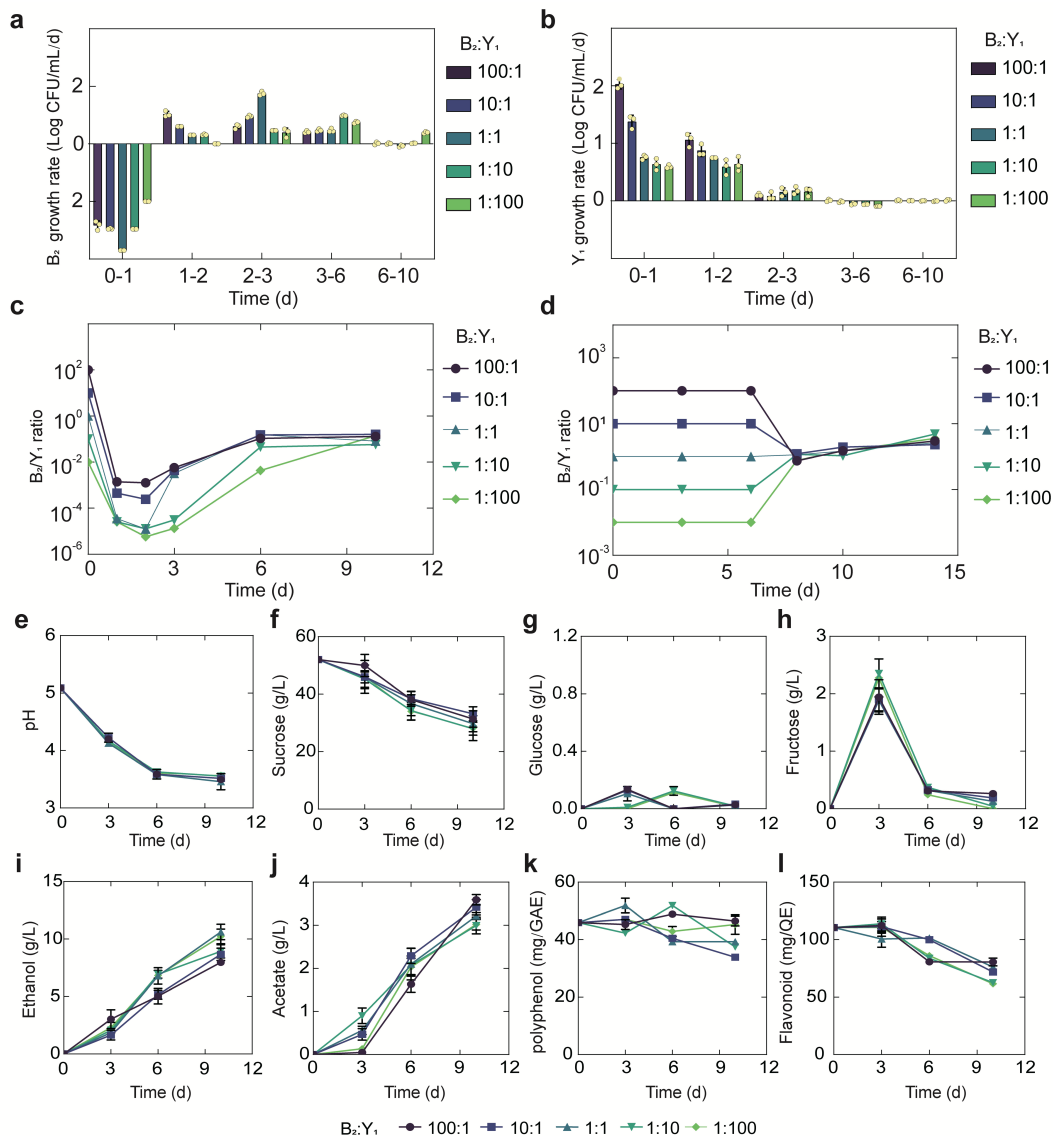

217  
 218 **Figure 3. Temporal compositional and metabolic dynamics of the minimal core (B<sub>2</sub>Y<sub>1</sub>).** a,  
 219 **b** Growth rates of B<sub>2</sub> (a) and Y<sub>1</sub> (b) in tea broth during the KT fermentation with 50 g/L sucrose.  
 220 **c** Bacterium-to-yeast population ratio of the microbes in broth. **d** Ratio of microbial populations  
 221 in pellicle during the fermentation. **e-i** pH, carbon sources and metabolites during the  
 222 fermentation driven by the core. Bars and error bars correspond to means and s.d.

223  
 224 Additionally, we quantified the temporal biochemical characteristics of the KT broth.  
 225 Strikingly, although initial population ratios were varied across four orders of magnitude, each of

226 the variables including pH, sugars, acids and tea-derived chemicals converged onto its own  
227 consensus pattern (Fig. 3e-l), akin to the convergence of composition in broth and pellicle.  
228 Specifically, regardless of the initial population composition, the pH dropped from 5.0 to 3.5  
229 through fermentation (Fig. 3e), which was associated with continuous sucrose reduction (Fig. 3f).  
230 Throughout the process, glucose remained at a low level (~0.1 g/L) (Fig. 3g) while fructose was  
231 relatively higher with a pulse-like profile (Fig. 3h). Acetate and ethanol on the other hand  
232 continued to accumulate during the fermentation (Fig. 3i,j). Polyphenol and flavonoids remained  
233 relatively stable with minor decrease (Fig. 3k,l). In the meanwhile, we found that throughout the  
234 fermentation process the temporal kinetics of different metabolites were coordinated. For  
235 example, continuous pH reduction (Fig. 3e) was in concert with sucrose drop (Fig. 3f), which  
236 was anti-correlated with the increase of ethanol (Fig. 3i) and acetate (Fig. 3j).

237

238 **Controlled fermentation assays yield causal claims for the core.** To decode the mechanistic  
239 origins of the observed patterns, we investigated the metabolic processes of the constituting  
240 species ( $B_2$  and  $Y_1$ ) by conducting comprehensive monoculture fermentations with defined  
241 settings. Here, we focused on sucrose, glucose, fructose, ethanol and acetate as the primary  
242 biochemical substances of interest based on our measure of the KT broth and previous  
243 literature report<sup>26, 27</sup>. We used them alone and in combination as substrates to grow  
244 monocultures (Methods) and quantified the temporal profiles of key substances, pH, biomass  
245 growth and pellicle formation, resulting a total of 30 panels (Fig. 4).

246

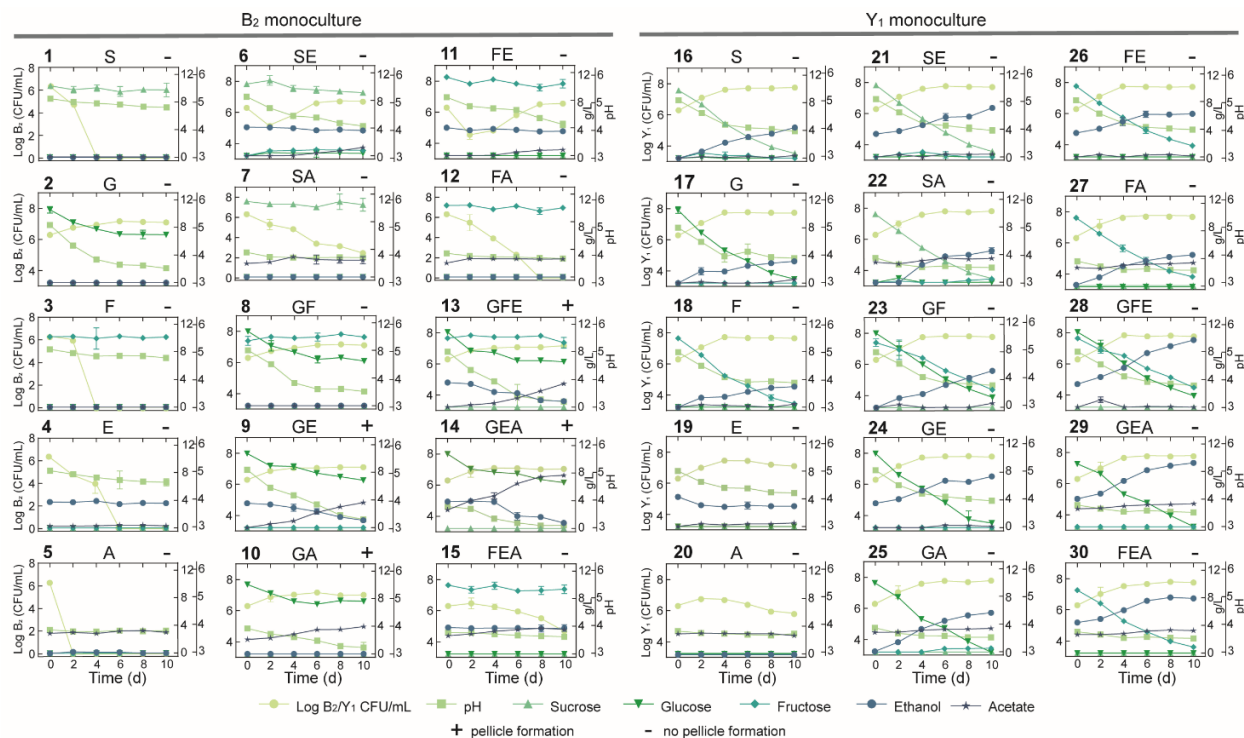

247  
 248 **Figure 4. Comprehensive fermentation tests for the B<sub>2</sub> and Y<sub>1</sub> monocultures with different**  
 249 **carbon sources.** Sucrose (abbreviated as S, 10 g/L), glucose (G, 10 g/L), fructose (F, 10 g/L),  
 250 ethanol (E, 50 mL/L) and acetate (A, 2 g/L) were used alone or in combination for fermentation.  
 251 The number on top left of each panel is the label of the experiment. The letters on top middle of  
 252 each panel indicate specific carbon sources used in the corresponding experiment. The + or –  
 253 sign on the top right indicates whether a pellicle was formed during the fermentation. Bars and  
 254 error bars correspond to means and s.d.

255  
 256 We harnessed the results of these panels to deduce biochemical conversion. As the  
 257 starting carbon source, sucrose alone was not degradable by B<sub>2</sub> as shown in panel 1  
 258 (abbreviated at P1) of Fig. 4 but consumable by Y<sub>1</sub> with the production of a trace amount of  
 259 glucose and fructose, ethanol accumulation, pH reduction and biomass growth (P16). Sucrose  
 260 also showed weak hydrolysis in the presence of ethanol or acetate, which increased microbial  
 261 survival (P6,7). Glucose and fructose were produced from sucrose hydrolysis primarily by Y<sub>1</sub> (16)

262 and minorly by ethanol and acetate (P6,7). Glucose was efficiently utilized by B<sub>2</sub> for growth (P2)  
263 and by Y<sub>1</sub> with biomass and ethanol accumulation (P17). Fructose was consumable for Y<sub>1</sub> (P18),  
264 not B<sub>2</sub> (P3), with ethanol and biomass production. Fructose was also slowly converted to  
265 glucose in the presence of ethanol, which supported B<sub>2</sub> growth (P11). Ethanol was produced  
266 solely by Y<sub>1</sub> during the metabolism of sucrose, glucose and fructose (P16,17,18), not by B<sub>2</sub>.  
267 Although ethanol alone was unusable by B<sub>2</sub> (P4), it was consumed with glucose (P9), resulting  
268 in acetate production and pellicle formation without obvious growth benefits compared to  
269 glucose alone. It thus implied that ethanol was used an energy source for pellicle formation as  
270 previously reported<sup>41</sup>. Ethanol was also utilized by Y<sub>1</sub> in a weak fashion to result in biomass and  
271 acetate production (P19). Acetate was produced primarily by B<sub>2</sub> in the presence of multiple  
272 substrates (P6,9,13-15), particularly when glucose and ethanol were co-present (P9,13,14). In  
273 addition to B<sub>2</sub>, Y<sub>1</sub> yielded a small amount of acetate with the consumption of sucrose, glucose,  
274 fructose or ethanol (P16-19). Acetate was additionally shown to minorly promote its own  
275 production by B<sub>2</sub> (P10 vs. P2) and ethanol production by Y<sub>1</sub> (P29,30 vs. P24,26).

276 Using the fermentation assays, we also inferred cellular tolerance to environmental stress.  
277 Comparison of the B<sub>2</sub> and Y<sub>1</sub> growth dynamics in single substrates showed that the yeast was  
278 more resistant than the bacterium to chemicals including ethanol and acetate (P4,5,19,20),  
279 which is another key factor that shapes community composition and metabolism. Additionally,  
280 the assays provided insight into pellicle formation. B<sub>2</sub> monoculture was capable of pellicle  
281 production (P9,10,13,14) whereas Y<sub>1</sub> was deficient under all conditions (P16-30). Moreover,  
282 comparison of the pellicle-forming conditions (P9,10,13,14) with single substrate conditions (P1-  
283 5) showed that efficient biofilm development required not only glucose but also ethanol or  
284 acetate as a co-substrate. Notably, although pellicle formation could occur in the presence of  
285 glucose as a sole carbon and energy source<sup>42</sup> for certain species, at least for those we  
286 investigated, it required two substrates to produce pellicle.

287 The above findings were synthesized and subsequently integrated with reported metabolic

288 reactions<sup>43-46</sup> into a system-level diagram (Fig. 5), which involves major metabolic flows within  
289 each species, interspecies fluxes mediated by the environment, and regulatory effects from  
290 metabolites to fluxes. To illustrate its implications, we attempted to account for the observed  
291 compositional characteristics of the core. As the diagram showed,  $Y_1$  breaks down sucrose into  
292 glucose and fructose for its own growth, which also benefits  $B_2$  by sharing glucose. Additionally,  
293  $Y_1$  secretes ethanol that is utilized by  $B_2$  when glucose is present. Thus, the core possesses a  
294 commensal relationship whereby  $Y_1$  provides two modes of benefits to  $B_2$ . By design, such an  
295 interaction confers the stability and convergence of the ecosystem composition, thus providing a  
296 mechanistic driver for the population convergence in broth and pellicle (Fig. 3c,d). The results  
297 also elucidated three ways in which  $Y_1$  is more robust than  $B_2$ : first,  $B_2$  relies on  $Y_1$  for glucose  
298 release; second,  $Y_1$  is more versatile for utilizing different substrates including sucrose, glucose,  
299 fructose and ethanol; third,  $Y_1$  has a higher tolerance to ethanol and acetate. These findings  
300 explained the temporal growth difference that  $B_2$  declined first before recovery while  $Y_1$   
301 monotonically grew since the beginning of fermentation (Fig. 3a,b).

302 Towards metabolic characteristics, the population of each species is a key determinant  
303 because total extracellular metabolites are determined by the productivity of individual cells  
304 multiplied by cell populations. Thus, for the same set of microbial species, the commensal  
305 interaction—which caused the convergence of population composition—also drove the  
306 convergence of temporal profiles of substrates, pH and metabolites as shown in Fig 3e-l.  
307 Additionally, although glucose and fructose were hydrolyzed simultaneously from sucrose, the  
308 former was consumed by both  $B_2$  and  $Y_1$  while the latter was useable exclusively for  $Y_1$ , which  
309 resulted in a constant low level of glucose but a relatively higher level of fructose (Fig. 3g,h).  
310 Moreover, utilizations of glucose and fructose were accompanied with the release of ethanol  
311 and the both sugars were derived from sucrose hydrolysis; thus, ethanol increase was anti-  
312 correlated with sucrose decrease (Fig. 3f,i). Acetate was mainly produced by  $B_2$  in the presence  
313 of glucose and ethanol, both of which were converted directly or indirectly from sucrose;

314 therefore, acetate accumulation was positively associated with sucrose consumption (Fig. 3f,j).

315

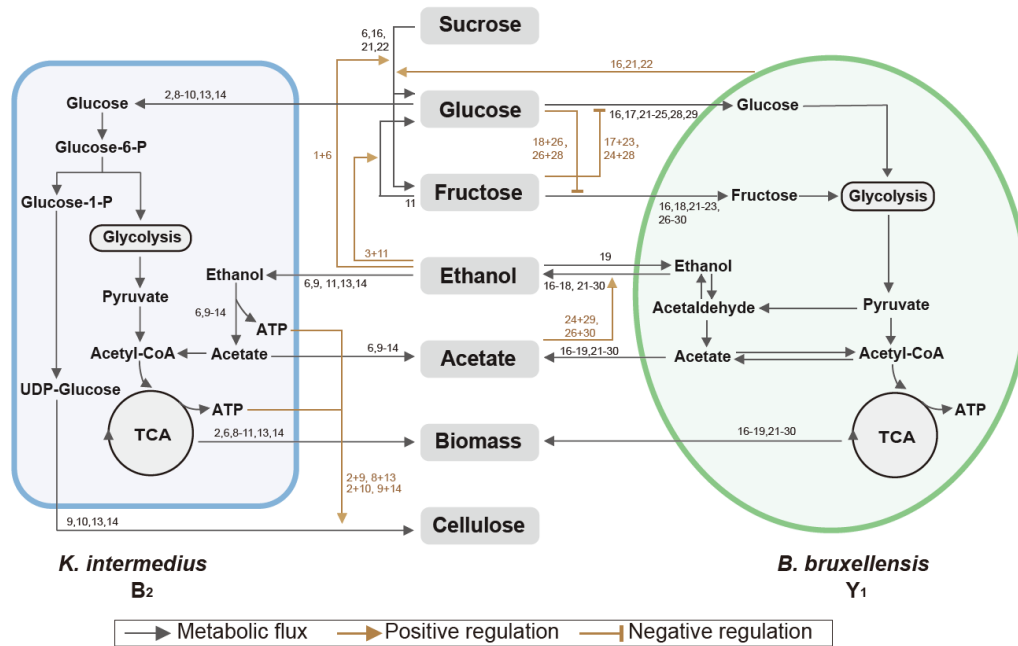

316

317 **Figure 5. Summary of metabolic processes underlying the core.** Black arrows refer to  
 318 metabolic fluxes while brown arrows correspond to positive or negative regulatory interactions.  
 319 The numbers associated with each arrow are the corresponding fermentation assays in Fig. 4  
 320 supporting the specific interaction.

321

322 For pellicle formation, the diagram showed that B<sub>2</sub> was solely responsible for pellicle  
 323 formation. Meanwhile, it was Y<sub>1</sub> that provided glucose and ethanol needed by B<sub>2</sub>. Such a  
 324 cooperative relationship accounted for the findings that B<sub>2</sub> or Y<sub>1</sub> alone was deficient in pellicle  
 325 formation and it needed the co-culture instead.

326 Relating to the bacterium-yeast symbiosis, some previous studies reported that the  
 327 microbial social interactions are commensal while others concluded to be mutual<sup>28,47</sup>. To resolve  
 328 this debate, we conducted experiments to examine possible benefits from B<sub>2</sub> to Y<sub>1</sub>. As certain  
 329 yeasts were suggested to secrete more invertase when co-cultured with cheaters<sup>48</sup>, we



330 measured the invertase activity of  $Y_1$  in monoculture and in co-culture with  $B_2$  but did not find  
331 significant difference between the two conditions ( $P < 0.05$ ) (Supplementary Fig. 3). We also  
332 compared the growth and metabolites of  $Y_1$  in the  $B_2Y_1$  co-culture and in monoculture with  
333 different initial ratios; however, the results showed that  $B_2$  did not affect either growth or  
334 metabolites except the increase of acetate which was produced by  $B_2$  (Supplementary Fig. 4).  
335 We additionally varied the  $B_2$  level while fixing  $Y_1$ 's initial amount and altered  $Y_1$  while  
336 maintaining the initial  $B_2$ . In both settings,  $Y_1$  growth was not affected by  $B_2$ , and all metabolic  
337 variables, except acetate, exhibited the same patterns (Supplementary Figs. 5,6). Therefore,  
338 although we did not rule out the possibility of altered interactions across SCOBYS, our  
339 experiments demonstrated that, at least in our system, the symbiosis driving the community is  
340 commensal instead of mutual.

341

342 **Insights into communities with increased complexity and varied conditions.** We have thus  
343 far illustrated the casual claims for the two-species core, but do these findings provide  
344 implications for communities with different complexity and settings? To answer the question, we  
345 assembled a consortium of 10 species ( $B_1$ ,  $B_2$ ,  $B_3$ ,  $B_4$ ,  $B_5$ ,  $Y_1$ ,  $Y_2$ ,  $Y_3$ ,  $Y_4$  and  $Y_5$ ). Using the  
346 consortium, we performed fermentations with the same medium as previous (i.e., black tea  
347 substrate supplemented with 50 g/L sucrose) and using different initial total bacteria-to-yeast  
348 ratios while keeping all bacterial species even and all yeast species even (Fig. 6a).

349 In bulk, the ten-species community yielded the same patterns as the two-species core,  
350 including the overall compositional convergence compared to the initial structure (Fig. 6b),  
351 continued sucrose consumption (Fig. 6c), increase in ethanol and acetate (Fig. 6d,e), monotonic  
352 pH reduction (Supplementary Fig. 7b), consistent lowness of glucose (Supplementary Fig. 7c),  
353 pulse-like fructose profile (Supplementary Fig. 7d) and successful pellicle formation (data not  
354 shown). The similarity in patterns suggested that the core served as a good approximation of  
355 the ten-species consortium and that the knowledge from the simple core provided predictive

356 insights into the behaviors of communities with an increased degree of complexity.

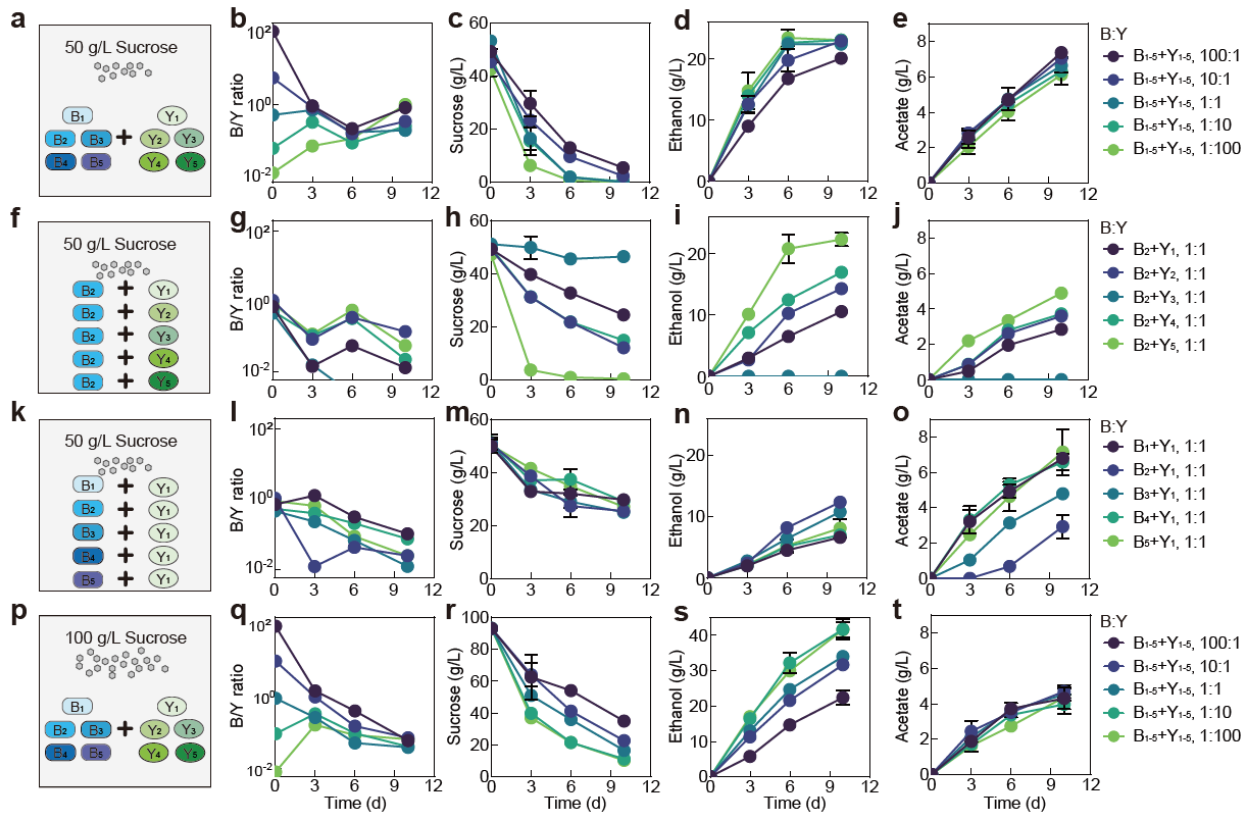

357

358 **Figure 6. Fermentation by synthetic communities with increased complexity and altered**

359 **conditions. a**, Schematic illustration of a ten-species community involving B<sub>1</sub>-B<sub>5</sub> and Y<sub>1</sub>-Y<sub>5</sub> in a

360 fermentation with 50 g/L of initial sucrose. **b-e** Population ratio (**b**), sucrose (**c**), ethanol (**d**) and

361 acetate (**e**) throughout the course of the fermentation shown in **a**. **f** Schematic illustration of 5

362 two-species communities with each involving B<sub>2</sub> and one of the yeasts (Y<sub>1</sub>-Y<sub>5</sub>) in a fermentation

363 starting with 50 g/L sucrose. **g-j** Population ratio, sucrose, ethanol and acetate during the

364 fermentation illustrated in **f**. **k** Schematic illustration of 5 two-species communities with each

365 involving Y<sub>1</sub> and one of the bacteria (B<sub>1</sub>-B<sub>5</sub>) in a fermentation with 50 g/L of initial sucrose. **i-o**

366 Population ratio, sucrose, ethanol and acetate during the course of fermentation illustrated in **k**.

367 **p** Schematic illustration of the ten-species community involving B<sub>1</sub>-B<sub>5</sub> and Y<sub>1</sub>-Y<sub>5</sub> in a

368 fermentation starting with 100 g/L sucrose. **q-t** Population ratio, sucrose, ethanol and acetate

369 during the fermentation depicted in **p**. Bars and error bars correspond to means and s.d.

370

371           Meanwhile, in detail, the two ecosystems showed differences in specific profiles. In the  
372 ten-species community, the composition converged from day 0 to 6 but diverged at day 10 (Fig.  
373 6b), different from the continuous convergence of the core (Fig. 3c,d). Compared to the core  
374 (Fig. 3), the ten-species community also yielded different metabolic patterns: its pH dropped  
375 faster (Supplementary Fig. 7b), sucrose was consumed quicker (Fig. 6c), fructose was more  
376 sensitive to initial conditions (Supplementary Fig. 7d), ethanol accumulated faster and  
377 nonlinearly with rapid production from day 0 to 6 followed by slower increase or crease from day  
378 6 to 10 (Fig. 6d), and acetate increased faster (Fig. 6e).

379           We speculated that these differences arose from the variability of the metabolic capacities  
380 of members constituting the communities. To test the speculation, we repeated the fermentation  
381 with five two-species co-cultures involving B<sub>2</sub> and different yeasts (Fig. 6f-j, Supplementary Fig.  
382 7e-h). The results confirmed that the yeasts were highly variable in sucrose consumption with Y<sub>5</sub>  
383 being the strongest and Y<sub>3</sub> the weakest (Fig. 6h). Additionally, owing to the coordinated  
384 metabolism revealed via the core, rapid sucrose consumption by B<sub>2</sub>Y<sub>5</sub> was associated with a  
385 relatively high B<sub>2</sub> abundance, a large pulse of glucose and fructose, rapid ethanol and acetate  
386 production and quick pH drop (Fig. 6g-j, Supplementary Fig. 7f-h); by contrast, weak sucrose  
387 consumption by B<sub>2</sub>Y<sub>3</sub> were accompanied with a low B<sub>2</sub> abundance, an undetectable level of  
388 glucose and fructose, abolished ethanol and acetate production, and slow pH reduction (Fig. 6g-  
389 j, Supplementary Fig. 7f-h). We also performed fermentation using the co-cultures of Y<sub>1</sub> with  
390 different bacterial species (Fig. 6k-o, Supplementary Fig. 7i-l). The five ecosystems showed a  
391 comparable sucrose consumption rate (Fig. 6m), suggesting that sucrose degradation was  
392 dictated primarily by yeast species although certain bacterial species (e.g. B<sub>1</sub>, B<sub>3</sub>, and B<sub>5</sub> in Fig.  
393 2a) could contribute. Meanwhile, the fermentations yielded varied ethanol and acetate patterns  
394 which were anti-correlated (Fig. 6n,o), suggesting that the ethanol-to-acetate conversion of the  
395 bacterial species were variable with B<sub>1</sub> being the strongest and B<sub>2</sub> the weakest.

396 From the above experiments, a mechanistic origin underlying the compositional and  
397 metabolic differences of the two- and ten-species communities emerged as following.  
398 Compared to the two-species core, the ten-species community had a higher overall sucrose  
399 consumption rate and a higher ethanol-to-acetate conversion rate which were averaged from  
400 the rates of the involved yeasts and bacteria. As a result, the ten-species community consumed  
401 sucrose faster (Fig. 6c), which subsequently led to a higher level of fructose, ethanol and  
402 acetate as well as a faster pH reduction (Fig. 6d,e, Supplementary Fig. 7b,d). Meanwhile, rapid  
403 sucrose degradation resulted in sucrose depletion in the middle of fermentation when the  
404 fermentation started with a high relative yeast abundance (e.g., 1:1, 1:10, 1:100) (Fig. 6c), which  
405 forced the yeast to metabolize fructose and ethanol instead of producing them. Under these  
406 scenarios, ethanol had a nonlinear pattern with rapid accumulation in the first few days and a  
407 slow increase or cease from day 6 to 10 (Fig. 6d). Meanwhile, as the commensal bacteria-yeast  
408 interaction relied primarily on the yeast to breakdown sucrose to provide glucose and ethanol for  
409 the bacteria, sucrose depletion also altered the strength of the symbiosis, which consequently  
410 shaped the dynamics of population convergence (Fig. 6b) because community dynamics was  
411 driven by the symbiosis.

412 Based on the finding that sucrose depletion shifted compositional and metabolic patterns,  
413 we hypothesized that, for the ten-species community, increasing sucrose availability could  
414 prevent sucrose depletion and hence drive its patterns closer to those of the core. We tested the  
415 hypothesis by performing the fermentation with 100 g/L sucrose (Fig. 6p-t, Supplementary Fig.  
416 7m-p). Indeed, the results showed that the microbial composition continued to converge  
417 throughout the course of fermentation (Fig. 6q) instead of first convergence then divergence in  
418 Fig. 6b. Meanwhile, the continuous sucrose reduction (Fig. 6r) was accompanied with a faster  
419 and approximately linear ethanol increase (Fig. 6s), a lower rate of acetate accumulation (Fig.  
420 6t), and a higher level of glucose and fructose (Supplementary Fig. 7o,p) compared to the 50  
421 g/L sucrose case (Fig. 6b-d, Supplementary Fig. 7b-d). Notably, here the glucose and fructose

422 patterns (Supplementary Fig. 7o,p) were still different from those of the core (Fig. 3g,h) because  
423 the ten-species community was much more efficient than the core for sucrose hydrolysis.

424 We further reasoned that the dependence of ecosystem characteristics on sucrose  
425 availability was not unique to the ten-species community and shall also apply to the two-species  
426 core. To test the reasoning, we performed the fermentation with the core using 5 g/L of sucrose  
427 (Supplementary Fig. 8). Remarkably, the composition converged in the first 3 days but diverged  
428 afterwards (Supplementary Fig. 8a) and ethanol started with linear increase initially but declined  
429 after day 3 (Supplementary Fig. 8h), similar to the case of the ten-species community with 50  
430 g/L sucrose (Fig. 6b,d). Conversely, when we increased the initial sucrose concentration to 100  
431 g/L (Supplementary Fig. 9), the compositional convergence of the core was restored  
432 (Supplementary Fig. 9a) and the ethanol profile became continuous accumulation  
433 (Supplementary Fig. 9h).

434 The results from the core and the ten-species community both informed that an increase in  
435 sucrose consumption results in a reduction or depletion in sucrose, an augmentation in the  
436 production of glucose, fructose, ethanol and acetate along with a reduction in environmental pH.  
437 Interestingly, such a relationship also explained the seemingly abnormal metabolite patterns of  
438 sample C, the outlier of the four native KT microbiome samples, that we observed at the  
439 beginning of our study (Fig. 1d). In that regard, our findings provided the mechanistic basis to  
440 understand the variations of metabolite patterns among the original microbiome samples.

441 Together, our experiments demonstrated that the knowledge from the minimal core offered  
442 predictive bulky insights into the traits of communities with varied system complexity and  
443 fermentation conditions. Meanwhile, the diversity in metabolic capacities, which was caused by  
444 the increase in species richness, accounted for the differences between the patterns of complex  
445 and minimal communities.

446

447 **Discussion**

448 With rapid advances in species cataloging and correlation analysis, one remaining grand  
449 challenge in microbiome research is to uncover causal claims that dictate microbial composition  
450 and function<sup>11-14,49,50</sup>. In this work, we present the identification, characterization and utilization of  
451 a minimal core for elucidating the molecular mechanisms driving the KT microbiome. We  
452 showed that metabolic underpinnings specified the structural and metabolic characteristics of  
453 the core and also provided insights into the behaviors of communities with increased complexity  
454 and altered conditions.

455 Lying at the heart of our study is the reduction in system complexity, which involves three  
456 key steps: identification of a core simplified from a native microbiome but capable of resembling  
457 the native, characterization of metabolic underpinnings of the core, and extrapolation of the  
458 knowledge from the core to communities with altered complexity and conditions. Although this  
459 study focused exclusively on the KT microbiome, the strategy demonstrated here is not limited  
460 to the specific ecosystem. Given its systematic nature, we expect that it may be extendable to  
461 other microbial communities. In that regard, our strategy provides a promising solution to  
462 address system complexity, a major hurdle for mechanistic investigation of microbiome.

463 Notably, although minimal cores serve as attractive alternatives to complex ecosystems,  
464 they are not intended to substitute native microbiomes. With the increase of complexity, certain  
465 compositional and metabolic traits identified in a core may be altered in its native counterpart.  
466 Conversely, novel properties may emerge when species richness increases. Thus, minimal  
467 cores provide a point of entry to unlock the mechanistic behaviors of a community, which shall  
468 be followed by the analysis of the full system for systematic understanding. Meanwhile, defining  
469 a proper core is critical for successful implementation of our framework. In principle, a single  
470 microbiome can possess multiple cores depending on different selection criteria, such as  
471 abundance, temporal pattern and function. Recent studies suggested to utilize gene level  
472 analysis rather than organismal lineage for core identification<sup>23,51</sup>. Nevertheless, future efforts in  
473 this direction are needed to fully realize the power of this community analysis strategy.

474           A major goal of the food industry is to improve food quality and flavor through the  
475 optimization of starter culture and fermentation process<sup>52-54</sup>. The synthetic core developed here  
476 successfully drove the KT fermentation, thereby serving as an effective, functional culture starter.  
477 Compared to the native microbiome, this well-defined, synthetic system offers a controllable  
478 platform to modulate the starter composition and metabolite secretion during fermentation.  
479 Therefore, the work also gives a potential solution to systematically tailor fermented foods with  
480 desired traits.

481 **Materials and Methods**

482

483 **Kombucha tea fermentation.** Black tea (Harney & Sons Fine Teas, Millerton, NY) was  
484 purchased as the tea substrate for the fermentation. The live starter culture SCOBY used as  
485 inoculum were obtained from 4 different commercial sources, referring to samples A, B, C and D.  
486 Kombucha tea was prepared as previously reported with minor modifications<sup>55, 56</sup>. Briefly, 1 L  
487 deionized water was boiled, added with 12 g/L black tea and allowed to infuse for 5 min. After  
488 removing the tea leaves, sucrose (50 g/L) was dissolved in hot tea. After cooling, the tea mixture  
489 was filtered through sterile sieve to 500 mL glass vessel with cotton and gauze caps. Then, 3.0%  
490 SCOBY and liquid broth (10% v/v) of the SCOBY samples were added to tea broth. The  
491 kombucha tea was incubated at 25°C for 14 days.

492

493 **Amplicon sequencing of 16S ribosomal RNA (rRNA) and ITSs.** Pellicle samples were first  
494 treated with 200 mg/mL cellulase (Sigma-Aldrich, Milan, Italy) for 16 h, and sonicated in ice bath  
495 for 1 min using a probe sonicator (Model 505, Fisherbrand, USA) for 1 min. Then the samples  
496 were centrifuged at 6500 rpm at 4°C for 10 min. The cell pellets were used for DNA extraction.  
497 Total DNA extractions were performed for tea broth and pellicle samples using Quick-DNA  
498 Fecal/soil Microbe Miniprep kit (ZYMO Research Corp.) according to the manufacturer's  
499 instructions.

500 16S rRNA gene and ITS amplicon sequencing library constructions and Illumina MiSeq  
501 sequencing were conducted by GENEWIZ, Inc. (South Plainfield, NJ, USA). Sequencing library  
502 was prepared using a MetaVx™ 16s rDNA Library Preparation kit and ITS-2 Library Preparation  
503 kit (GENEWIZ, Inc., South Plainfield, NJ, USA). Briefly, for each sample, 50 ng DNA was used  
504 to generate amplicons that cover the V3 and V4 hypervariable regions of bacteria and ITS-2  
505 hypervariable region of fungi. Afterwards, each sample was added with indexed adapters. The  
506 barcoded amplicons were sequenced on the Illumina MiSeq platform using 2 × 250 paired-end



507 (PE) configuration (Illumina, San Diego, CA, USA).

508 Raw sequence data was converted into FASTQ files and de-multiplexed using Illumina's  
509 bcl2fastq 2.17 software. QIIME data analysis package was used for 16S rRNA and ITS rRNA  
510 data analysis<sup>57</sup>. All the reads (forward and reverse) were assigned to different samples based  
511 on barcode, and then truncated by cutting off the primer and barcode. After quality filtering<sup>58</sup>, the  
512 sequences were compared with the RDP Gold database to detect chimeric sequences using the  
513 UCHIME algorithm<sup>59</sup>. Subsequently, the effective sequences were grouped into operational  
514 taxonomic units (OTUs) using the clustering program VSEARCH (1.9.6) against the Silva 119  
515 database for bacteria<sup>60</sup> and the UNITE ITS database for fungi<sup>61</sup>, with pre-clustered at 97% of  
516 sequence identity. The Ribosomal Database Program (RDP) classifier was used to assign  
517 taxonomic category to all OTUs at a confidence threshold of 80%<sup>62</sup>.

518

519 **Species isolation and identification.** For species isolation, kombucha tea broths were diluted  
520 and plated directly whereas pellicle samples were sonicated and digested before dilution as  
521 described above. Diluted samples were then inoculated in different selective media. For  
522 bacterial isolation, de Man, Rogosa and Sharpe medium (MRS), Mannitol medium<sup>40</sup>, and  
523 Glucose yeast extract calcium carbonate medium (GYC)<sup>63</sup> were used in conjugation with 0.1%  
524 cycloheximide or 500 ug/mL natamycin for inhibiting fungi growth. Isolation of yeast species was  
525 carried out using the yeast extract peptone dextrose (YPD) medium supplemented with 100  
526 mg/L chloramphenicol. Isolated species were identified by Sanger sequencing of the 16S and  
527 26S rRNA gene regions, with the universal primers B-f (5'-AGAGTTTAGTCCTGGCTCAG-3')  
528 and B-r (5'- AAGGAGGTGATCCAGCCGCA-3') for bacteria<sup>64</sup>, and NL-1 (5'-  
529 GCATATCAATAAGCGGAGGAAAAG-3') and NL-4 (5'-GGTCCGTGTTTCAAGACGG-3') for  
530 yeasts<sup>40</sup>.

531

532 **Biochemical analyses.** The pH was measured with a pH meter (AE150; Fisher Scientific,

533 Waltham, MA) inserted directly into samples. Acetate, glucuronate and ethanol concentrations  
534 were determined by high performance liquid chromatography (HPLC, Agilent Technologies 1200  
535 Series) equipped with a refractive index detector using a Rezex ROA Organic Acid H+ (8%)  
536 column (Phenomenex Inc. Germany). The column was eluted with 0.005 N of H<sub>2</sub>SO<sub>4</sub> at a flow  
537 rate of 0.6 mL/min at 50°C<sup>65</sup>. Sucrose, glucose and fructose were analyzed using RCM  
538 Monosaccharide Ca<sup>2+</sup> column (Phenomenex Inc., Germany). The column was eluted with  
539 deionized water at a flow rate of 0.6 mL/min at 80°C<sup>66</sup>. For gluconate detection, the gluconic  
540 acid Kit (Megazyme, Ireland) was used. The concentration of total polyphenols was measured  
541 by the Folin-Ciocalteu colorimetric method, with gallic acid as standard. The absorbance was  
542 measured at 765 nm and the results were expressed as mg of gallic acid equivalent (GAE) per  
543 mL of kombucha tea (mg GAE/mL)<sup>67</sup>. The total flavonoids were determined using an aluminum  
544 chloride assay using quercetin as standard. The absorbance was measured at 430 nm and the  
545 content was expressed as mg of quercetin equivalent (QE) per mL of kombucha tea (mg  
546 QE/mL)<sup>68</sup>. The invertase activity was determined according to the method described by Laurent  
547 *et al*<sup>69</sup>. The remaining sucrose was detected by HPLC as described above. The measurement of  
548 pellicle weight was based on the descriptions of Florea *et al.* using 0.1 M NaOH for  
549 pretreatment<sup>70</sup>.

550

551 **Co-culture fermentation experiments.** All the stocked bacteria and yeasts isolates were  
552 grown in YPD media and then centrifuged and washed twice with fresh tea liquid (12 g/L) at  
553 6500 g for 5 min. Synthetic, pairwise bacterium-yeast cocultures were assessed in tea liquid  
554 with 50 g/L sucrose. Bacteria species included *Komagataeibacter rhaeticus* (B<sub>1</sub>),  
555 *Komagataeibacter intermedius* (B<sub>2</sub>), *Gluconacetobacter europaeus* (B<sub>3</sub>), *Gluconobacter oxydans*  
556 (B<sub>4</sub>) and *Acetobacter senegalensis* (B<sub>5</sub>). Yeasts included *Brettanomyces bruxellensis* (Y<sub>1</sub>),  
557 *Zygosaccharomyces bailii* (Y<sub>2</sub>), *Candida sake* (Y<sub>3</sub>), *Lachancea fermentati* (Y<sub>4</sub>) and  
558 *Schizosaccharomyces pombe* (Y<sub>5</sub>). For each pairwise co-culture, the total inoculation was as a

559 final amount at  $2 \times 10^6$  CFU/mL and the inoculation amounts of bacteria and yeast were equal.  
560 Monoculture of each species was used as control group and the inoculation was also as a final  
561 amount at  $2 \times 10^6$  CFU/mL. The cultures were then incubated at 30 °C, and microbial populations  
562 and biochemical parameters were measured after 10 d fermentation. To count bacteria and  
563 yeasts, 1000 ug/mL of natamycin or 100 mg/L chloramphenicol of was added respectively.

564 The B<sub>2</sub>-Y<sub>1</sub> consortium was fermented in tea liquid supplemented with 5, 50, 100 g/L  
565 sucrose individually. To characterize the consortium, B<sub>2</sub> and Y<sub>1</sub> were inoculated at different initial  
566 ratios from 100:1 to 10:1, 1:1, 1:10 and 1:100. The growth rates of B<sub>2</sub> and Y<sub>1</sub> and the B<sub>2</sub>/Y<sub>1</sub> ratio  
567 were calculated. Meanwhile, to determine the effect of Y<sub>1</sub> on B<sub>2</sub>, we performed the Y<sub>1</sub>  
568 monoculture experiment using the same inoculation amount as the B<sub>2</sub>Y<sub>1</sub> co-culture. Moreover,  
569 we fixed the inoculation of B<sub>2</sub> or Y<sub>1</sub> ( $1 \times 10^6$  CFU/mL) but varied the amount of the other species  
570 from 0 to  $1 \times 10^4$ ,  $1 \times 10^5$ ,  $1 \times 10^6$ ,  $1 \times 10^7$  CFU/mL. Additionally, to determine if different species differ  
571 in growth and metabolic ability, Y<sub>1</sub> was co-cultured with different bacterial species (B<sub>1</sub>, B<sub>2</sub>, B<sub>3</sub>, B<sub>4</sub>  
572 and B<sub>5</sub>) and B<sub>2</sub> was co-cultured with different fungal species (Y<sub>1</sub>, Y<sub>2</sub>, Y<sub>3</sub>, Y<sub>4</sub> or Y<sub>5</sub>) in tea  
573 substrate supplemented with 50 g/L sucrose. The population dynamics and biochemical  
574 parameters were measured at 0, 3, 6, 10 d or 0, 1, 2, 3, 6, 10 d. To count microbes in pellicles,  
575 the pellicles were first digested by shaking for 16 h at 4 °C in 15 ml of PBS buffer with 2%  
576 cellulase (Sigma Aldrich, C2730).

577  
578 **Monoculture fermentation with different carbon sources.** To uncover the metabolic  
579 underpinnings that drive microbial population dynamics and metabolite synthesis, we conducted  
580 a series of monoculture growth experiments for B<sub>2</sub> and Y<sub>1</sub> using different carbon sources.  
581 Specifically, we used 10 g/L sucrose, 10 g/L fructose, 10 g/L glucose, 50 mg/L ethanol and 2 g/L  
582 acetate for fermentation. The initial inoculation of B<sub>2</sub> and Y<sub>1</sub> was  $2 \times 10^6$  CFU/mL. The population  
583 and biochemical parameters were measured at 2 d intervals.

584

585 **Construction and fermentation of communities with increased complexity.** The five  
586 bacterial isolates (B<sub>1</sub>, B<sub>2</sub>, B<sub>3</sub>, B<sub>4</sub> and B<sub>5</sub>) and the five yeast isolates (Y<sub>1</sub>, Y<sub>2</sub>, Y<sub>3</sub>, Y<sub>4</sub> and Y<sub>5</sub>) were  
587 pooled together to create a synthetic, ten-species community. In initial inoculations, all bacterial  
588 species were equally abundant, and all yeast species were also equal; however, the total  
589 bacteria-to-yeasts ratio was varied from 100:1, 10:1,1:1, 1:10, to 1:100 while fixing the total  
590 amount of inoculation ( $2 \times 10^6$  CFU/mL). Two different sucrose levels, 50 and 100 g/L, were  
591 added to tea liquid for fermentation. The population dynamics and biochemical parameters were  
592 measured at 0, 3, 6, 10 d.

593

#### 594 **Statistical analysis**

595

596 All the experiments were performed for three times. Redundancy analysis between microbial  
597 community and metabolites was performed with Canoco 5.0 software (Microcomputer Power,  
598 Ithaca, NY). The hierarchical cluster analysis and principal component analysis on different  
599 consortia were performed with the SIMCA-14.1 software (Umetrics, Sweden). For hierarchical  
600 cluster analysis, the distances between observations were calculated using Ward's method  
601 based on the concentrations of different metabolites. Heatmaps of the chemical properties of  
602 the 25 two-species fermentations and 10 single-species fermentations were produced using the  
603 heatmap package with Z-score normalization in R.

604

#### 605 **Data availability**

606

607 Amplicon sequencing data are deposited at the NCBI and available under a Bioproject ID  
608 PRJNA764354. Reference sequences of all bacterial and yeasts isolates are deposited at the  
609 NCBI. Supplementary Tables 1 and 2 contain accession numbers for all of the sequences.

610

611 **Acknowledgements**

612

613 This work was supported by the National Science Foundation (1553649). X.H. was supported  
614 by the China Scholarship Council.

615

616 **Author contributions**

617

618 T.L. conceived the project; T.L. and X.H. designed the study; X.H. and Y.X. performed the  
619 experiments and collected the data; X.H. and T.L. analyzed the data; T.L. and X.H. wrote the  
620 paper.

621

622 **Competing interests**

623

624 The authors declare no competing interests.

625

626 **References**

- 627 1. Bulgarelli, D., Schlaeppi, K., Spaepen, S., Van Themaat, E. V., & Schulze-Lefert, P. Structure  
628 and functions of the bacterial microbiota of plants. *Annu. Rev. Plant Biol.* 64, 807-838 (2013).
- 629 2. Singh, B. K., Trivedi, P., Egidi, E., Macdonald, C. A. & Delgado-Baquerizo, M. Crop  
630 microbiome and sustainable agriculture. *Nat. Rev. Microbiol.* 18, 601-602 (2020).
- 631 3. Falkowski, P.G., Fenchel, T. & Delong, E.F. The microbial engines that drive Earth's  
632 biogeochemical cycles. *Science* 320, 1034-1039 (2008).
- 633 4. Canfield, D. E., Glazer, A. N., & Falkowski, P. G. The evolution and future of Earth's nitrogen  
634 cycle. *Science* 330, 192-196 (2010).
- 635 5. Cho, I., and Blaser, M. J. The human microbiome: at interface of health and disease. *Nat. Rev.*  
636 *Genet.* 13, 260-270 (2012).
- 637 6. Turnbaugh, P. J., Ley, R. E., Hamady, M., Fraser-Liggett, C. M., Knight, R., & Gordon, J. I.  
638 The human microbiome project. *Nature* 449, 804-810 (2007).
- 639 7. Oliverio, A. M., Power, J. F., Washburne, A., Cary, S. C., Stott, M. B., & Fierer, N. The ecology  
640 and diversity of microbial eukaryotes in geothermal springs. *ISME J.* 12, 1918-1928 (2018).
- 641 8. Zhernakova, A., Kurilshikov, A., Bonder, M. J., Tigchelaar, E. F., Schirmer, M., Vatanen, T.,  
642 Mujagic, Z., Vila, A. V., Falony, G., Vieira-Silva, S., & Wang, J. Population-based metagenomics  
643 analysis reveals markers for gut microbiome composition and diversity. *Science* 352, 565-569  
644 (2016).
- 645 9. Trivedi, P., Leach, J. E., Tringe, S. G., Sa, T., & Singh, B. K. Plant–microbiome interactions:  
646 from community assembly to plant health. *Nat. Rev. Microbiol.* 18, 607-621 (2020).
- 647 10. Bahram, M., Hildebrand, F., Forslund, S. K., Anderson, J. L., Soudzilovskaia, N. A.,  
648 Bodegom, P. M., Bengtsson-Palme, J., Anslan, S., Coelho, L. P., Harend, H., Huerta-Cepas, J.  
649 Structure and function of the global topsoil microbiome. *Nature* 560, 233-237 (2018).
- 650 11. Fischbach, M. A. Microbiome: focus on causation and mechanism. *Cell* 174, 785-790 (2018).
- 651 12. Gilbert, J. A., Blaser, M. J., Caporaso, J. G., Jansson, J. K., Lynch, S. V., & Knight, R.

- 652 Current understanding of the human microbiome. *Nat. Med.* 24, 392-400 (2018).
- 653 13. Schmidt, T. S., Raes, J., & Bork, P. The human gut microbiome: from association to  
654 modulation. *Cell*, 172, 1198-1215 (2018).
- 655 14. Skelly, A.N., Sato, Y., Kearney, S. and Honda, K., Mining the microbiota for microbial and  
656 metabolite-based immunotherapies. *Nat. Rev. Immunol.* 19, 305-323 (2019).
- 657 15. Kau, A. L., Ahern, P. P., Griffin, N. W., Goodman, A. L. & Gordon, J. I. Human nutrition, the  
658 gut microbiome and the immune system. *Nature* 474, 327-336 (2011).
- 659 16. Dalile, B., Van Oudenhove, L., Vervliet, B., & Verbeke, K. The role of short-chain fatty acids  
660 in microbiota–gut–brain communication. *Nat. Rev. Gastroenterol. Hepatol.* 16 (8), 461-478  
661 (2019).
- 662 17. Lebeer, S., Claes, I. J., Verhoeven, T. L., Vanderleyden, J. & De Keersmaecker, S. C.  
663 Exopolysaccharides of *Lactobacillus rhamnosus* GG form a protective shield against innate  
664 immune factors in the intestine. *Microb. Biotechnol.* 4, 368-374 (2011).
- 665 18. Qin, J., Li, R., Raes, J., Arumugam, M., Burgdorf, K. S., Manichanh, C., ... & Wang, J. A  
666 human gut microbial gene catalogue established by metagenomic sequencing. *Nature* 464, 59-  
667 65 (2010).
- 668 19. Kumar, G. C., Chaudhary, J., Meena, L. K., Meena, A. L., & Kumar, A. Function-driven  
669 microbial genomics for ecofriendly agriculture. *Microbes in Land Use Change Management.*  
670 389-431, (2021).
- 671 20. Shade, A. & Handelsman, J. Beyond the Venn diagram: the hunt for a core microbiome.  
672 *Environ. Microbiol.* 14, 4-12 (2012).
- 673 21. Risely, A. Applying the core microbiome to understand host–microbe systems. *J. Anim. Ecol.*  
674 89, 1549-1558 (2020).
- 675 22. Hernandez-Agreda, A., Gates, R. D., & Ainsworth, T. D. Defining the core microbiome in  
676 corals' microbial soup. *Trends Microbiol.* 25, 125-140 (2017).
- 677 23. Turnbaugh, P. J., Hamady, M., Yatsunenko, T., Cantarel, B. L., Duncan, A., Ley, R. E., ... &

- 678 Gordon, J. I. A core gut microbiome in obese and lean twins. *Nature* 457, 480-484 (2009).
- 679 24. Zorz, J. K., Sharp, C., Kleiner, M., Gordon, P. M., Pon, R. T., Dong, X., & Strous, M. A shared  
680 core microbiome in soda lakes separated by large distances. *Nat. Commun.* 10, 1-10 (2019).
- 681 25. Soares, M. G., de Lima, M., & Schmidt, V. C. R. Technological aspects of kombucha, its  
682 applications and the symbiotic culture (SCOBY), and extraction of compounds of interest: A  
683 literature review. *Trends Food Sci. Technol.* 110, 539-550 (2021).
- 684 26. Jayabalan, R., Malbaša, R. V., Lončar, E. S., Vitas, J. S. & Sathishkumar, M. A review on  
685 kombucha tea-microbiology, composition, fermentation, beneficial effects, toxicity, and tea  
686 fungus. *Compr. Rev. Food Sci. Food Saf.* 13, 538-550 (2014).
- 687 27. Villarreal-Soto, S. A., Beaufort, S., Bouajila, J., Souchard, J. P., & Taillandier, P.  
688 Understanding kombucha tea fermentation: a review. *J. Food Sci.* 83, 580-588 (2018).
- 689 28. Laavanya, D., Shirkole, S., & Balasubramanian, P. Current challenges, applications and  
690 future perspectives of SCOBY cellulose of Kombucha fermentation. *J. Clean. Prod.* 295, 126454  
691 (2021).
- 692 29. Blasche, S., Kim, Y., Mars, R. A., Machado, D., Maansson, M., Kafkia, E., ... & Patil, K. R.  
693 Metabolic cooperation and spatiotemporal niche partitioning in a kefir microbial community. *Nat.*  
694 *Microbiol.* 6, 196-208 (2021).
- 695 30. Wolfe, B. E., Button, J. E., Santarelli, M., & Dutton, R. Cheese rind communities provide  
696 tractable systems for in situ and in vitro studies of microbial diversity. *Cell* 158, 422-433 (2014).
- 697 31. Zhang, Y., Kastman, E. K., Guasto, J. S., & Wolfe, B. E. Fungal networks shape dynamics of  
698 bacterial dispersal and community assembly in cheese rind microbiomes. *Nat. Commun.* 9, 1-12  
699 (2018).
- 700 32. Cosetta, C. M., & Wolfe, B. E. Deconstructing and reconstructing cheese rind microbiomes  
701 for experiments in microbial ecology and evolution. *Curr. Protoc. Microbiol.* 56, e95 (2020).
- 702 33. Pierce, E. C., Morin, M., Little, J. C., Liu, R. B., Tannous, J., Keller, N. P., ... & Dutton, R.  
703 J.Bacterial–fungal interactions revealed by genome-wide analysis of bacterial mutant fitness.



- 704 *Nat. Microbiol.* 6, 87-102 (2021).
- 705 34. Melkonian, C., Gottstein, W., Blasche, S., Kim, Y., Abel-Kistrup, M., Swiegers, H., Saerens,  
706 S., Edwards, N., Patil, K. R., Teusink, B., & Molenaar, D. Finding functional differences between  
707 species in a microbial community: case studies in wine fermentation and Kefir culture. *Front.*  
708 *Microbiol.* 10, 1347 (2019).
- 709 35. Miller, E. R., Kearns, P. J., Niccum, B. A., O'Mara Schwartz, J., Ornstein, A., & Wolfe, B. E.  
710 Establishment limitation constrains the abundance of lactic acid bacteria in the Napa cabbage  
711 phyllosphere. *Appl. Environ. Microbiol.* 13, e00269-19 (2019).
- 712 36. Wolfe, B. E., & Dutton, R. Fermented foods as experimentally tractable microbial  
713 ecosystems. *Cell* 161, 49-55 (2015).
- 714 37. Reva, O. N., Zaets, I. E., Ovcharenko, L. P., Kukharenko, O. E., Shpylova, S. P., Podolich, O.  
715 V., de Vera, J. P., & Kozyrovska, N. O. Metabarcoding of the kombucha microbial community  
716 grown in different microenvironments. *AMB Express* 5, 1-8 (2015).
- 717 38. Villarreal-Soto, S. A., Bouajila, J., Pace, M., Leech, J., Cotter, P. D., Souchard, J. P.,  
718 Taillandier, P., & Beaufort, S. Metabolome-microbiome signatures in the fermented beverage,  
719 Kombucha. *Int. J. Food Microbiol.* 333, 108778 (2020).
- 720 39. Cardoso, R. R., Neto, R. O., dos Santos D'Almeida, C. T., do Nascimento, T. P., Pressete, C.  
721 G., Azevedo, L., Martino, H. S. D., Cameron, L. C., Ferreira, M. S. L. & de Barros, F. A. R.  
722 Kombuchas from green and black teas have different phenolic profile, which impacts their  
723 antioxidant capacities, antibacterial and antiproliferative activities. *Food Res. Int.* 128, 108782  
724 (2020).
- 725 40. Coton, M., Pawtowski, A., Taminiau, B., Burgaud, G., Deniel, F., Coulloume-Labarthe L.,  
726 Fall, A., Daube, G., Coton, E. Unraveling microbial ecology of industrial-scale Kombucha  
727 fermentations by metabarcoding and culture-based methods. *FEMS Microbiol. Ecol.* 93, (2017).
- 728 41. Molina-Ramírez, C., Enciso, C., Torres-Taborda, M., Zuluaga, R., Gañán, P., Rojas, O. J., &  
729 Castro, C. Effects of alternative energy sources on bacterial cellulose characteristics produced

- 730 by *Komagataeibacter medellinensis*. *Int. J. Biol. Macromol.* 117, 735-741 (2018).
- 731 42. Masaoka, S., Ohe, T., & Sakota, N. Production of cellulose from glucose by *Acetobacter*  
732 *xylinum*. *J. Ferment. Bioeng.* 75, 18-221 (1993).
- 733 43. Koschwanez, J. H., Foster, K. R. & Murray, A. W. Sucrose utilization in budding yeast as a  
734 model for the origin of undifferentiated multicellularity. *PLOS Biol.* 9, e1001122 (2011).
- 735 44. DeRisi, J. L., Iyer, V. R., & Brown, P. O. Exploring the metabolic and genetic control of gene  
736 expression on a genomic scale. *Science* 278, 680-686 (1997).
- 737 45. Smith, B. D., & Benoit, D. *Brettanomyces bruxellensis*, a survivalist prepared for the wine  
738 apocalypse and other beverages. *Food Microbiol.* 59, 161-175 (2016).
- 739 46. Liu, M., Liu, L., Jia, S., Li, S., Zou, Y., & Zhong, C. Complete genome analysis of  
740 *Gluconacetobacter xylinus* CGMCC 2955 for elucidating bacterial cellulose biosynthesis and  
741 metabolic regulation. *Sci. Rep.* 8, 1-10 (2018).
- 742 47. May, A., Narayanan, S., Alcock, J., Varsani, A., Maley, C., & Aktipis, A. Kombucha: a novel  
743 model system for cooperation and conflict in a complex multi-species microbial ecosystem.  
744 *PeerJ* 7, e7565 (2019).
- 745 48. Celiker, H. & Gore, J. Competition between species can stabilize public-goods cooperation  
746 within a species. *Mol. Syst. Biol.* 8, 621 (2012).
- 747 49. Taroncher-Oldenburg, G., Jones, S., Blaser, M., Bonneau, R., Christey, P., Clemente, J.  
748 C., ... & Wang, J. Translating microbiome futures. *Nat. Biotechnol.* 36, 1037-1042 (2018).
- 749 50. Lv, B. M., Quan, Y., & Zhang, H. Y. Causal inference in microbiome medicine: principles and  
750 applications. *Trends Microbiol.* 29, 736-746 (2021).
- 751 51. Turnbaugh, P. J., & Gordon, J. I. The core gut microbiome, energy balance and obesity. *J.*  
752 *Physiol.* 587, 4153-4158 (2009).
- 753 52. Vinicius De Melo Pereira, G., De Carvalho Neto, D. P., Junqueira, A. C. D. O., Karp, S. G.,  
754 Letti, L. A., Magalhães Júnior, A. I., & Soccol, C. R. A review of selection criteria for starter  
755 culture development in the food fermentation industry. *Food Rev. Int.* 36, 135-167(2020).

- 756 53. Zhao, M., Su, X. Q., Nian, B., Chen, L. J., Zhang, D. L., Duan, S. M., ... & Ma, Y. Integrated  
757 meta-omics approaches to understand the microbiome of spontaneous fermentation of  
758 traditional Chinese Pu-erh tea. *MSystems* 4, e00680-19 (2019).
- 759 54. Jin, G., Zhu, Y., & Xu, Y. Mystery behind Chinese liquor fermentation. *Trends Food Sci.*  
760 *Technol.* 63, 18-28 (2017).
- 761 55. Jayabalan, R., Marimuthu, S. & Swaminathan, K. Changes in content of organic acids and  
762 tea polyphenols during kombucha tea fermentation. *Food Chem.* 102, 392-398 (2007).
- 763 56. Cardoso, R. R., Neto, R. O., dos Santos D'Almeida, C. T., do Nascimento, T. P., Pressete, C.  
764 G., Azevedo, L., Martino, H. S. D., Cameron, L. C., Ferreira, M. S. L. & de Barros, F. A. R.  
765 Kombuchas from green and black teas have different phenolic profile, which impacts their  
766 antioxidant capacities, antibacterial and antiproliferative activities. *Food Res. Int.* 128, 108782  
767 (2020)
- 768 57. Caporaso, J. G., Kuczynski, J., Stombaugh, J., Bittinger, K., Bushman, F. D., Costello, E.  
769 K., ... & Knight, R. QIIME allows analysis of high-throughput community sequencing data. *Nat.*  
770 *Methods* 7, 335-336 (2010).
- 771 58. Ren, Z., Qu, X., Peng, W., Yu, Y. & Zhang, M. Nutrients drive the structures of bacterial  
772 communities in sediments and surface waters in the river-lake system of Poyang Lake. *Water* 11,  
773 930 (2019).
- 774 59. Edgar, R.C., Haas, B.J., Clemente, J.C., Quince, C. & Knight, R. UCHIME improves  
775 sensitivity and speed of chimera detection. *Bioinformatics* 27, 2194-2200 (2011).
- 776 60. Quast C, Pruesse E, Yilmaz P, Gerken J, Schweer T, Yarza P, Peplies J, & Glöckner F. O.  
777 The SILVA ribosomal RNA gene database project: improved data processing and web-based  
778 tools. *Nucleic Acids Res.* 41, 590-596 (2012).
- 779 61. Nilsson, R. H., Larsson, K. H., Taylor, A. F. S., Bengtsson-Palme, J., Jeppesen, T. S.,  
780 Schigel, D., ... & Abarenkov, K. The UNITE database for molecular identification of fungi:  
781 handling dark taxa and parallel taxonomic classifications. *Nucleic Acids Res.* 47, 259-264 (2019).

- 782 62. Cole, J. R., Wang, Q., Cardenas, E., Fish, J., Chai, B., Farris, R. J., Kulam-Syed-Mohideen,  
783 A. S., McGarrell, D. M., Marsh, T., Garrity, G. M., & Tiedje, J. M. The Ribosomal Database  
784 Project: improved alignments and new tools for rRNA analysis. *Nucleic Acids Res.* 37, 141-145  
785 (2009).
- 786 63. Kim, D.H., Chon, J.W., Kim, H. & Seo, K.H. Development of a novel selective medium for  
787 the isolation and enumeration of acetic acid Bacteria from various foods. *Food Control* 106,  
788 106717 (2019).
- 789 64. Huang, X., Fan, Y., Meng, J., Sun, S., Wang, X., Chen, J., & Han, B. Z. Laboratory-scale  
790 fermentation and multidimensional screening of lactic acid bacteria from Daqu. *Food Biosci.* 40,  
791 100853 (2021).
- 792 65. Ha, S. J., Galazka, J. M., Kim, S. R., Choi, J. H., Yang, X., Seo, J. H., Glass, N. L., Cate, J.  
793 H., & Jin, Y. S. Engineered *Saccharomyces cerevisiae* capable of simultaneous cellobiose and  
794 xylose fermentation. *PNAS* 108, 504-509 (2011).
- 795 66. Ilaslan, K., Boyaci, I.H. & Topcu, A. J. Rapid analysis of glucose, fructose and sucrose  
796 contents of commercial soft drinks using Raman spectroscopy. *Food Control* 48, 56-61 (2015).
- 797 67. Bhattacharya, S., Gachhui, R. & Sil, P. C. Effect of Kombucha, a fermented black tea in  
798 attenuating oxidative stress mediated tissue damage in alloxan induced diabetic rats. *Food*  
799 *Chem. Toxicol.* 60, 328-340 (2013).
- 800 68. Sun, T.Y., Li, J.S. & Chen, C. Effects of blending wheatgrass juice on enhancing phenolic  
801 compounds and antioxidant activities of traditional kombucha beverage. *J. Food Drug Anal.* 23,  
802 709-718 (2015).
- 803 69. Laurent, J., Timmermans, E., Struyf, N., Verstrepen, K. J. & Courtin, C. M. Variability in  
804 yeast invertase activity determines the extent of fructan hydrolysis during wheat dough  
805 fermentation and final FODMAP levels in bread. *Int. J. Food Microbiol.* 326, 108648 (2020).
- 806 70. Florea, M., Hagemann, H., Santosa, G., Abbott, J., Micklem, C. N., Spencer-Milnes, X., ... &  
807 Ellis, T. Engineering control of bacterial cellulose production using a genetic toolkit and a new

808 cellulose-producing strain. *PNAS* 113, 3431-3440 (2016).

## Supplementary Information

### **A Systematic, Complexity-Reduction Approach to Dissect Microbiome: the Kombucha Tea Microbiome as an Example**

Xiaoning Huang<sup>1,2,3</sup>, Yongping Xin<sup>1,2</sup>, and Ting Lu<sup>1,2,4,5,6,\*</sup>

<sup>1</sup> Department of Bioengineering, University of Illinois Urbana-Champaign, Urbana, IL, USA

<sup>2</sup> Carl R. Woese Institute for Genomic Biology, University of Illinois Urbana-Champaign, Urbana, IL 61801, USA

<sup>3</sup> College of Food Science and Nutritional Engineering, China Agricultural University, Beijing 100083, China

<sup>4</sup> Department of Physics, University of Illinois Urbana-Champaign, Urbana, IL, USA

<sup>5</sup> Center for Biophysics and Quantitative Biology, University of Illinois Urbana-Champaign, Urbana, IL 61801, USA

<sup>6</sup> National Center for Supercomputing Applications, Urbana, IL 61801, USA

\*Corresponding author. E-mail: [luting@illinois.edu](mailto:luting@illinois.edu)

## 19 Supplementary Table

20 **Supplementary Table 1: List of isolated bacterial species.** Representative species

21 diversity is given by the identification of 16S rRNA gene sequence of 33 bacterial isolates.

22

| Strain ID               | Strain                                 | Origin   | Accession number |
|-------------------------|----------------------------------------|----------|------------------|
| KTB1 (B <sub>5</sub> )  | <i>Acetobacter senegalensis</i>        | Sample B | OK178227         |
| KTB2                    | <i>Acetobacter senegalensis</i>        | Sample B | OK178228         |
| KTB3                    | <i>Acetobacter senegalensis</i>        | Sample B | OK178229         |
| KTB4                    | <i>Acetobacter tropicalis</i>          | Sample B | OK178230         |
| KTB5                    | <i>Acetobacter tropicalis</i>          | Sample B | OK178231         |
| KTB6                    | <i>Acetobacter tropicalis</i>          | Sample B | OK178232         |
| KTB7                    | <i>Acetobacter musti</i>               | Sample C | OK178233         |
| KTB8                    | <i>Acetobacter peroxydans</i>          | Sample D | OK178234         |
| KTB9                    | <i>Acetobacter peroxydans</i>          | Sample D | OK178235         |
| KTB10 (B <sub>4</sub> ) | <i>Gluconobacter oxydans</i>           | Sample A | OK178236         |
| KTB11                   | <i>Gluconobacter oxydans</i>           | Sample A | OK178237         |
| KTB12                   | <i>Gluconobacter oxydans</i>           | Sample A | OK178238         |
| KTB13                   | <i>Gluconobacter oxydans</i>           | Sample A | OK178239         |
| KTB14                   | <i>Gluconobacter oxydans</i>           | Sample D | OK178240         |
| KTB15                   | <i>Gluconobacter oxydans</i>           | Sample D | OK178241         |
| KTB16                   | <i>Gluconobacter oxydans</i>           | Sample D | OK178242         |
| KTB17                   | <i>Gluconobacter oxydans</i>           | Sample D | OK178243         |
| KTB18 (B <sub>3</sub> ) | <i>Gluconacetobacter europaeus</i>     | Sample D | OK178244         |
| KTB19                   | <i>Komagataeibacter xylinus</i>        | Sample A | OK178245         |
| KTB20 (B <sub>1</sub> ) | <i>Komagataeibacter rhaeticus</i>      | Sample A | OK178246         |
| KTB21                   | <i>Komagataeibacter rhaeticus</i>      | Sample B | OK178247         |
| KTB22                   | <i>Komagataeibacter rhaeticus</i>      | Sample B | OK178248         |
| KTB23                   | <i>Komagataeibacter rhaeticus</i>      | Sample D | OK178249         |
| KTB24                   | <i>Komagataeibacter rhaeticus</i>      | Sample A | OK178250         |
| KTB25                   | <i>Komagataeibacter rhaeticus</i>      | Sample C | OK178251         |
| KTB26 (B <sub>2</sub> ) | <i>Komagataeibacter intermedius</i>    | Sample D | OK178252         |
| KTB27                   | <i>Komagataeibacter intermedius</i>    | Sample D | OK178253         |
| KTB28                   | <i>Komagataeibacter intermedius</i>    | Sample D | OK178254         |
| KTB29                   | <i>Komagataeibacter intermedius</i>    | Sample C | OK178255         |
| KTB30                   | <i>Komagataeibacter intermedius</i>    | Sample D | OK178256         |
| KTB31                   | <i>Komagataeibacter saccharivorans</i> | Sample A | OK178257         |
| KTB32                   | <i>Oenococcus oeni</i>                 | Sample B | OK178258         |
| KTB33                   | <i>Oenococcus oeni</i>                 | Sample B | OK178259         |

23

24 **Supplementary Table 2: List of isolated fungal species.** Representative species  
25 diversity is given by the identification of D1/D2 large ribosomal subunit region sequence  
26 of 30 yeast isolates.

27

| Strain ID               | Strain                            | Origin   | Accession number |
|-------------------------|-----------------------------------|----------|------------------|
| KTY1 (Y <sub>1</sub> )  | <i>Brettanomyces bruxellensis</i> | Sample A | OK271194         |
| KTY2                    | <i>Brettanomyces bruxellensis</i> | Sample A | OK271195         |
| KTY3                    | <i>Brettanomyces bruxellensis</i> | Sample A | OK271196         |
| KTY4                    | <i>Brettanomyces bruxellensis</i> | Sample A | OK271197         |
| KTY5                    | <i>Brettanomyces bruxellensis</i> | Sample D | OK271198         |
| KTY6                    | <i>Brettanomyces bruxellensis</i> | Sample B | OK271199         |
| KTY7                    | <i>Brettanomyces bruxellensis</i> | Sample C | OK271200         |
| KTY8                    | <i>Brettanomyces bruxellensis</i> | Sample D | OK271201         |
| KTY9                    | <i>Brettanomyces bruxellensis</i> | Sample A | OK271202         |
| KTY10                   | <i>Brettanomyces bruxellensis</i> | Sample C | OK271203         |
| KTY11                   | <i>Brettanomyces bruxellensis</i> | Sample C | OK271204         |
| KTY12                   | <i>Brettanomyces bruxellensis</i> | Sample D | OK271205         |
| KTY13                   | <i>Brettanomyces bruxellensis</i> | Sample D | OK271206         |
| KTY14                   | <i>Brettanomyces bruxellensis</i> | Sample D | OK271207         |
| KTY15                   | <i>Brettanomyces anomalus</i>     | Sample D | OK271208         |
| KTY16                   | <i>Pichia fermentans</i>          | Sample B | OK271209         |
| KTY17                   | <i>Pichia fermentans</i>          | Sample B | OK271210         |
| KTY18 (Y <sub>3</sub> ) | <i>Candida sake</i>               | Sample B | OK271211         |
| KTY19                   | <i>Candida sake</i>               | Sample B | OK271212         |
| KTY20                   | <i>Candida sake</i>               | Sample B | OK271213         |
| KTY21                   | <i>Candida sake</i>               | Sample B | OK271214         |
| KTY22                   | <i>Candida sake</i>               | Sample B | OK271215         |
| KTY23                   | <i>Candida sake</i>               | Sample B | OK271216         |
| KTY24 (Y <sub>4</sub> ) | <i>Lachancea fermentati</i>       | Sample D | OK271217         |
| KTY25                   | <i>Lachancea fermentati</i>       | Sample D | OK271218         |
| KTY26                   | <i>Lachancea fermentati</i>       | Sample D | OK271219         |
| KTY27                   | <i>Lachancea fermentati</i>       | Sample D | OK271220         |
| KTY28                   | <i>Lachancea fermentati</i>       | Sample D | OK271221         |
| KTY29 (Y <sub>5</sub> ) | <i>Schizosaccharomyces pombe</i>  | Sample D | OK271222         |
| KTY30 (Y <sub>2</sub> ) | <i>Zygosaccharomyces bailii</i>   | Sample D | OK271223         |

28



29 **Supplementary Table 3 : Chemical property analysis of the core candidates and**  
 30 **their controls.**

31

|                               | pH        | Sucrose<br>(g/L) | Glucose<br>(g/L) | Fructose<br>(g/L) | Glucuronate<br>(g/L) | Ethanol<br>(g/L) | Acetate<br>(g/L) | Polyphenol<br>(g/L) | Flavonoid<br>(g/L) |
|-------------------------------|-----------|------------------|------------------|-------------------|----------------------|------------------|------------------|---------------------|--------------------|
| B <sub>1</sub> Y <sub>1</sub> | 3.5±0.1   | 27.48±3.72       | 0.91±0.18        | 0.77±0.42         | 0                    | 6.98±0.66        | 6.59±0.38        | 17.77±1.43          | 86.81±1.78         |
| B <sub>1</sub> Y <sub>2</sub> | 3.48±0.12 | 11.51±1.85       | 6.01±1           | 4.67±1.53         | 0                    | 14.67±1.97       | 3.31±0.26        | 8.11±0.79           | 86.2±3.58          |
| B <sub>1</sub> Y <sub>3</sub> | 5.56±0.3  | 32.76±2.79       | 1.06±0.15        | 0                 | 0                    | 2.02±1.16        | 0.69±0.02        | 8.15±0.22           | 145.22±5.59        |
| B <sub>1</sub> Y <sub>4</sub> | 3.67±0.17 | 6.9±0.7          | 0                | 0.62±0.11         | 0                    | 23.44±1.29       | 3.44±0.56        | 23.25±1.29          | 93.42±1.02         |
| B <sub>1</sub> Y <sub>5</sub> | 3.14±0.64 | 1.24±0.19        | 6.19±1.29        | 1.31±0.09         | 0                    | 18.75±0.84       | 4.4±0.3          | 9.68±0.81           | 75.43±1.01         |
| B <sub>2</sub> Y <sub>1</sub> | 3.46±0.1  | 26.2±3.16        | 0.03±0.04        | 0.12±0.02         | 0                    | 12.21±1.41       | 3.24±0.35        | 56.45±2.47          | 80.76±0.68         |
| B <sub>2</sub> Y <sub>2</sub> | 3.68±0.05 | 12.03±0.18       | 1.72±0.15        | 0.47±0.3          | 0                    | 14.67±0.71       | 3.71±0.22        | 41.75±1.91          | 71.44±3.63         |
| B <sub>2</sub> Y <sub>3</sub> | 5.39±0.16 | 45.03±2.41       | 0.36±0.05        | 0.36±0.03         | 0                    | 0.04±0.02        | 0                | 59.66±3.74          | 111.88±3.37        |
| B <sub>2</sub> Y <sub>4</sub> | 3.6±0.16  | 13.37±2.56       | 0.67±0.37        | 0.75±0.16         | 0                    | 18.04±1.78       | 3.68±0.11        | 36.15±2.33          | 81.27±2.05         |
| B <sub>2</sub> Y <sub>5</sub> | 3.27±0.23 | 0.31±0.09        | 0.48±0.25        | 2.1±0.74          | 0                    | 23.53±2.16       | 4.45±0.79        | 42.42±1.1           | 89.33±3.47         |
| B <sub>3</sub> Y <sub>1</sub> | 3.39±0.21 | 24.11±1.74       | 1.3±0.41         | 0.33±0.06         | 0                    | 11.66±1.55       | 4.22±1.01        | 37.59±1.12          | 92.36±2            |
| B <sub>3</sub> Y <sub>2</sub> | 3.66±0.07 | 23.37±1.52       | 4.48±0.8         | 2.32±0.67         | 0                    | 9.32±0.77        | 2.25±0.78        | 50.04±2.91          | 74.3±2.11          |
| B <sub>3</sub> Y <sub>3</sub> | 5.62±0.05 | 44.31±1.98       | 0.44±0.1         | 0                 | 0                    | 0.06±0.01        | 0                | 23.68±0.4           | 128.24±10.05       |
| B <sub>3</sub> Y <sub>4</sub> | 3.56±0.17 | 11.25±1.16       | 0                | 0.21±0.09         | 0                    | 23.25±3.39       | 2.95±0.45        | 27.21±0.72          | 73.67±6.13         |
| B <sub>3</sub> Y <sub>5</sub> | 3.46±0.04 | 0.24±0.02        | 0                | 0.1±0.01          | 0.05±0               | 22.91±3          | 1.36±0.02        | 24.71±0.44          | 98.27±3.59         |
| B <sub>4</sub> Y <sub>1</sub> | 3.5±0.05  | 28.09±2.09       | 0.1±0.1          | 0.28±0.15         | 0.01±0               | 7.21±0.48        | 6.56±0.35        | 18.82±1.02          | 82.52±1.81         |
| B <sub>4</sub> Y <sub>2</sub> | 3.94±0.52 | 17.43±1.25       | 6.42±1.05        | 0                 | 0                    | 6.51±0.86        | 2.38±0.46        | 24.21±1.97          | 68.36±1.9          |
| B <sub>4</sub> Y <sub>3</sub> | 5.37±0.16 | 40.51±1.5        | 0.88±0.05        | 0.77±0.06         | 0                    | 0                | 0                | 58.76±6.28          | 106.97±9.5         |
| B <sub>4</sub> Y <sub>4</sub> | 3.61±0.01 | 11.28±0.98       | 0                | 1.27±0.25         | 0.06±0.01            | 24.61±2.29       | 3.24±0.27        | 28.32±1.45          | 77.55±2.15         |
| B <sub>4</sub> Y <sub>5</sub> | 3.11±0.47 | 2.36±0.22        | 3.6±1.01         | 2.01±0.59         | 0                    | 23.66±0.17       | 0.99±0.2         | 52.47±1.32          | 76.91±0.8          |
| B <sub>5</sub> Y <sub>1</sub> | 3.41±0.01 | 26.29±1.76       | 1.1±0.02         | 1.54±0.29         | 0                    | 9.03±1.94        | 6.55±1.38        | 56.61±2.96          | 101.85±2.28        |
| B <sub>5</sub> Y <sub>2</sub> | 3.38±0.08 | 14.08±1.67       | 7.18±1.05        | 5±1               | 0                    | 12.85±0.62       | 1.95±0.48        | 66.62±3.8           | 89.01±1.48         |
| B <sub>5</sub> Y <sub>3</sub> | 5.56±0.07 | 36.46±4.09       | 1.47±0.08        | 1.23±0.12         | 0                    | 0                | 0                | 75.92±3.5           | 75.85±5.09         |
| B <sub>5</sub> Y <sub>4</sub> | 3.51±0.02 | 10.75±2.68       | 0                | 0.2±0.01          | 0                    | 23.93±2.49       | 2.17±0.07        | 50.86±1.76          | 84.05±3.32         |
| B <sub>5</sub> Y <sub>5</sub> | 3.32±0.13 | 0.33±0.1         | 0                | 0.05±0.01         | 0.06±0.01            | 26.81±2.01       | 1.79±0.12        | 36.3±1.55           | 100.75±2.5         |
| B <sub>1</sub>                | 4.74±0.08 | 42.57±1.21       | 0.9±0.1          | 0                 | 0                    | 0                | 0                | 33.22±1.81          | 122.05±3.09        |
| B <sub>2</sub>                | 4.82±0.08 | 49.35±0.56       | 0                | 0                 | 0                    | 0                | 0                | 51.46±2.46          | 108.61±6.3         |
| B <sub>3</sub>                | 4.9±0.06  | 43.47±1.06       | 0                | 0                 | 0                    | 0                | 0                | 47.64±3.05          | 127.14±7.31        |
| B <sub>4</sub>                | 4.71±0.06 | 48.89±1.1        | 0                | 0                 | 0                    | 0                | 0                | 48.27±2.03          | 91.69±11.02        |
| B <sub>5</sub>                | 5.27±0.05 | 43.57±1.48       | 0                | 0                 | 0                    | 0                | 0                | 57.29±2.28          | 116.5±15.05        |
| Y <sub>1</sub>                | 3.7±0.04  | 26.46±1.03       | 0.2±0.1          | 0                 | 0                    | 17.54±0.58       | 0.38±0.04        | 57.2±3.53           | 110.56±1.15        |
| Y <sub>2</sub>                | 3.82±0.08 | 3.62±0.65        | 0                | 0.41±0.1          | 0                    | 22.21±0.58       | 0.05±0.01        | 40.95±0.71          | 56.21±8.58         |
| Y <sub>3</sub>                | 5.13±0.07 | 44.11±0.21       | 0                | 0                 | 0                    | 0                | 0                | 42.33±1.24          | 139.23±9.59        |
| Y <sub>4</sub>                | 3.77±0.08 | 1.47±0.73        | 0.45±0.05        | 0.09±0.01         | 0                    | 26.37±0.88       | 0.35±0.02        | 28.03±3.21          | 101.86±4.55        |
| Y <sub>5</sub>                | 3.4±0.03  | 0.19±0.06        | 0                | 1.08±0.16         | 0                    | 25.73±1.02       | 0                | 34.32±1.81          | 119.05±18.16       |

32

### 33 Supplementary Figures

34

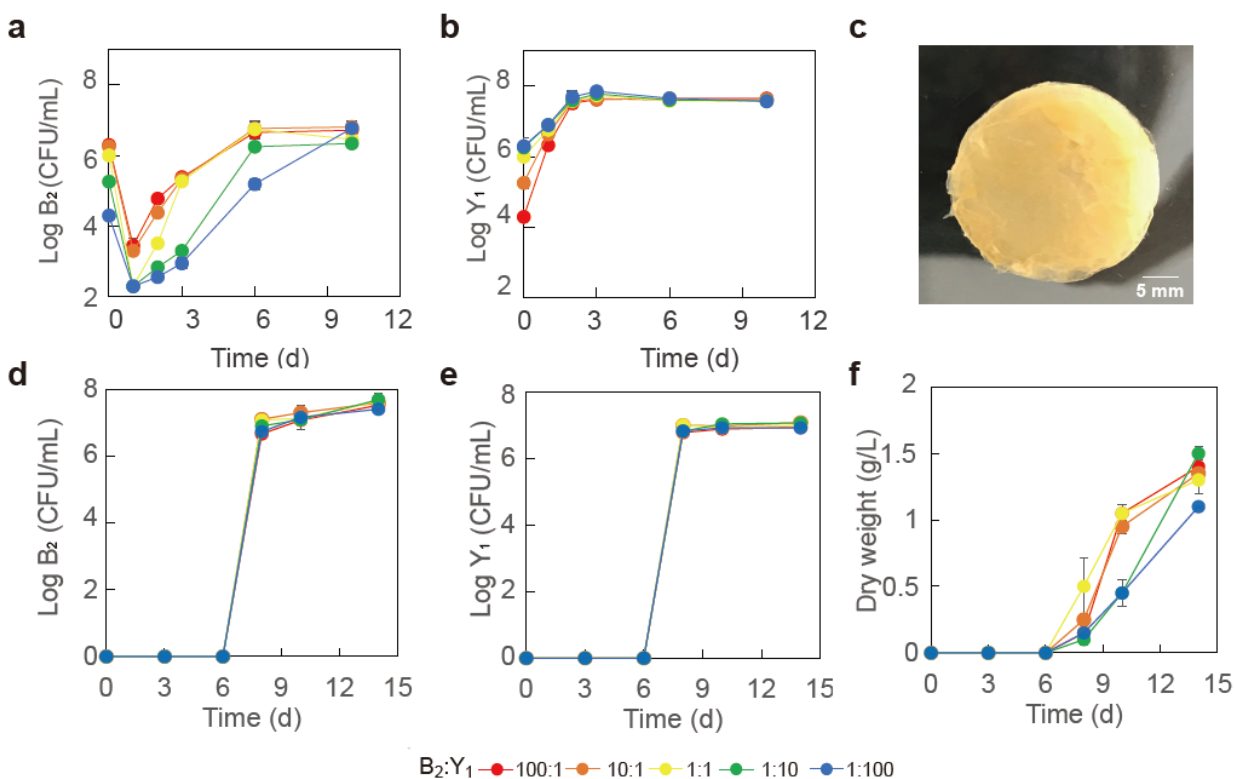

35

### 36 Supplementary Figure 1. Population dynamics and pellicle formation of the minimal

37 core ( $B_2Y_1$ ). **a, b** Populations of  $B_2$  (**a**) and  $Y_1$  (**b**) in broth during a fermentation starting

38 with 50 g/L sucrose. **c** Image of a typical pellicle formed during the fermentation. **d, e**

39 Populations of  $B_2$  (**d**) and  $Y_1$  (**e**) in pellicle during the fermentation. **f** Dry weight of pellicles

40 during the fermentation. Five initial compositions were used for fermentation, including

41 100:1 to 10:1, 1:1, 1:10 and 1:100. Bars and error bars correspond to means and s.d.

42 respectively.

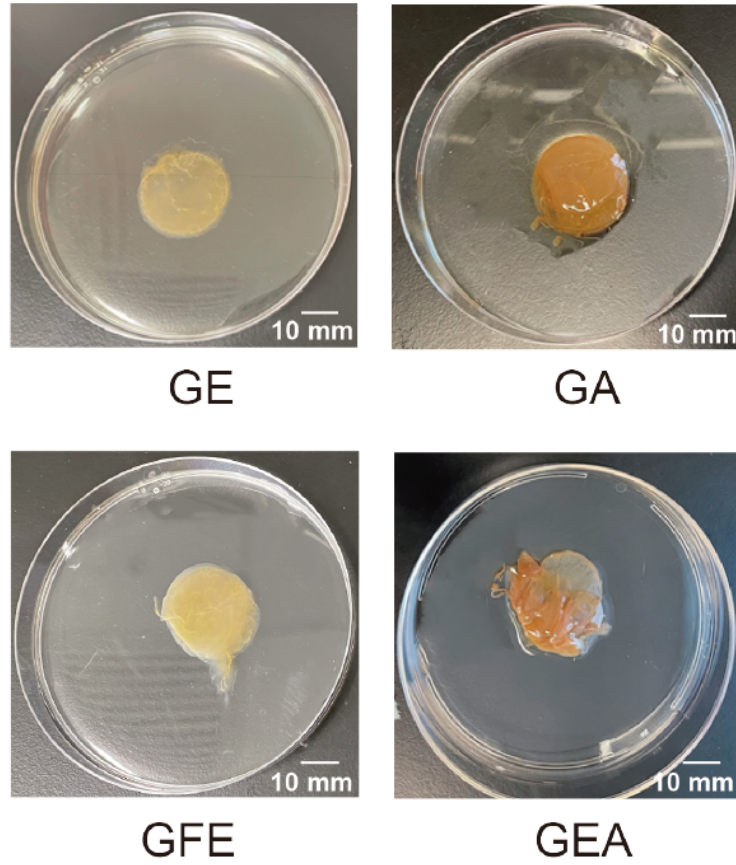

43

44 **Supplementary Figure 2. Images of pellicles formed by B<sub>2</sub> monoculture with**  
45 **different carbon sources.** GE: glucose and ethanol; GA: glucose and acetate; GFE:  
46 glucose, fructose and ethanol; GEA: glucose, ethanol and acetate.

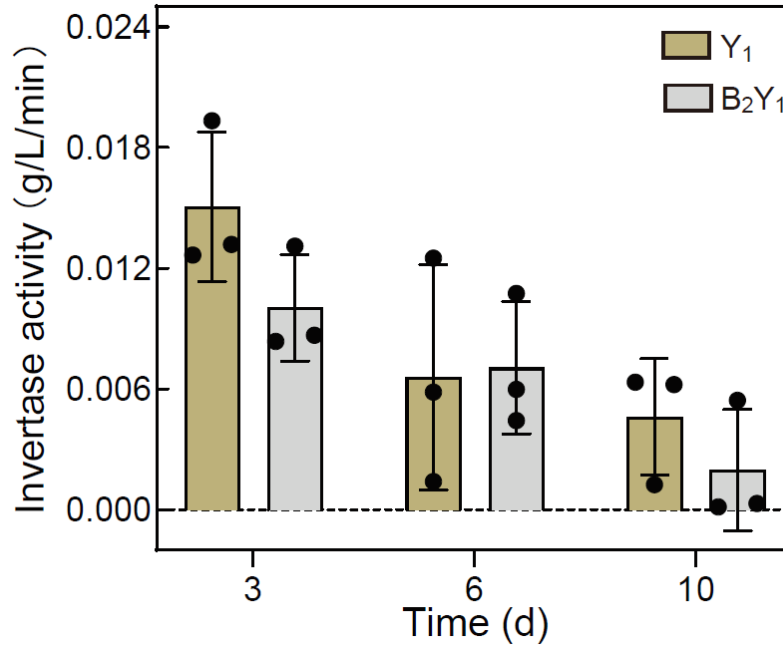

47

48 **Supplementary Figure 3. Sucrose invertase activity of Y<sub>1</sub> monoculture and B<sub>2</sub>Y<sub>1</sub> co-**

49 **culture at different fermentation times.** The invertase activity is defined as the amount

50 of sucrose reduction per minute for a given amount of yeast cells (inoculation amount:

51  $1 \times 10^6$  CFU/mL). Bars and error bars correspond to means and s.d. respectively. T-test of

52 paired samples in each time point did not show significant differences at  $P < 0.05$ .

53 ( $P = 0.129732$  on day 3;  $P = 0.906200$  on day 6;  $P = 0.335084$  on day 10.)

54

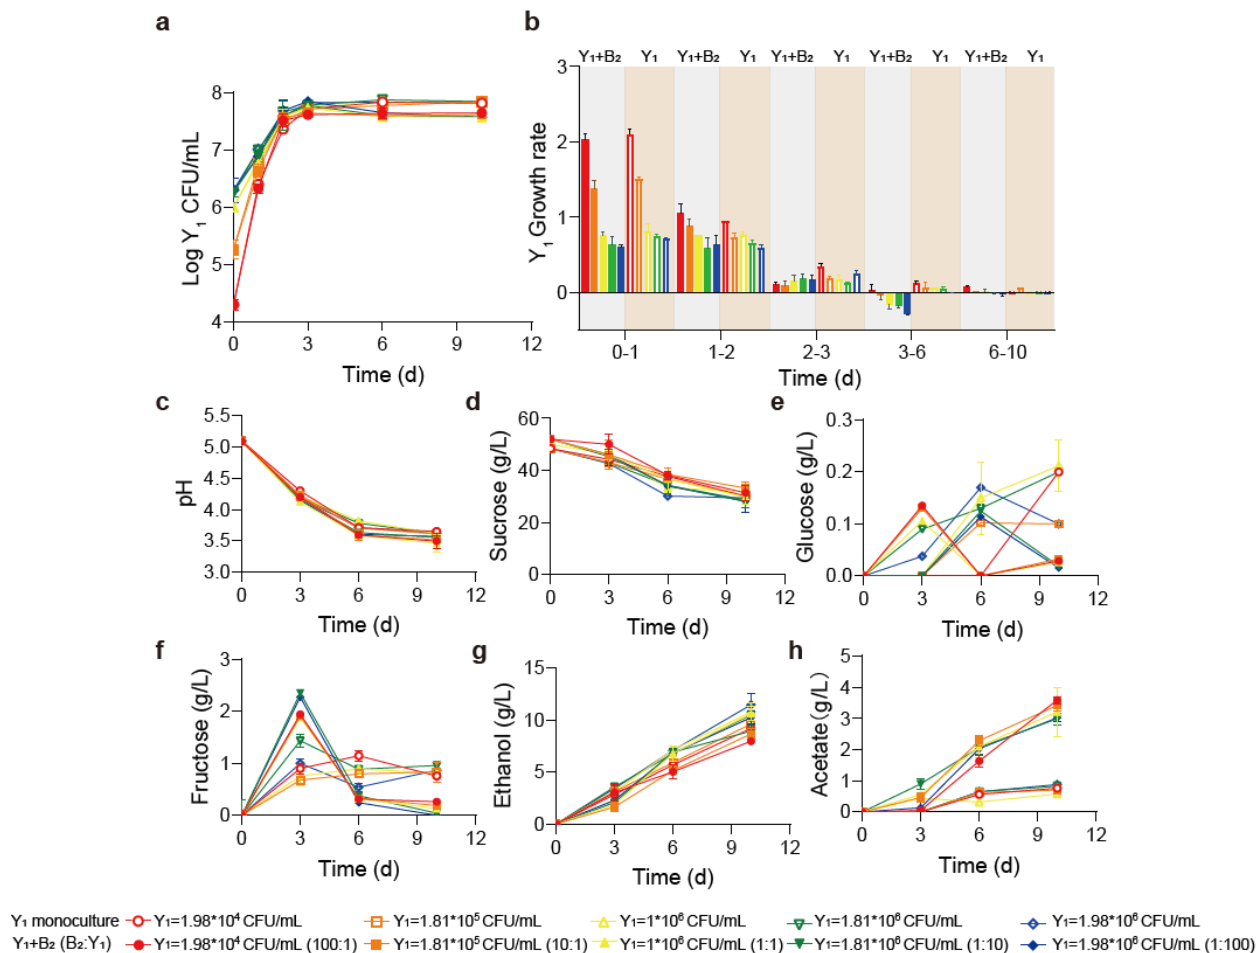

55  
 56 **Supplementary Figure 4. Comparison of the population and metabolic dynamics**  
 57 **of Y<sub>1</sub> monoculture and B<sub>2</sub>Y<sub>1</sub> co-culture. a, b** Population (a) and growth rate (b) of Y<sub>1</sub> in  
 58 monoculture and in the B<sub>2</sub>Y<sub>1</sub> co-culture. **c-h** pH, carbon sources and metabolites during  
 59 the fermentations of the monoculture and the co-culture. Open and filled symbols  
 60 correspond to the Y<sub>1</sub> monoculture and the B<sub>2</sub>Y<sub>1</sub> co-culture, respectively. For the co-culture,  
 61 the total inoculation amount was fixed at 2\*10<sup>6</sup> CFU/mL but the bacterium-yeast ratio was  
 62 varied from 100:1 to 1:100. For the monoculture, the total bacterium population was  
 63 varied in alignment with the bacterial population in the corresponding co-culture. Bars and  
 64 error bars correspond to means and s.d. respectively.

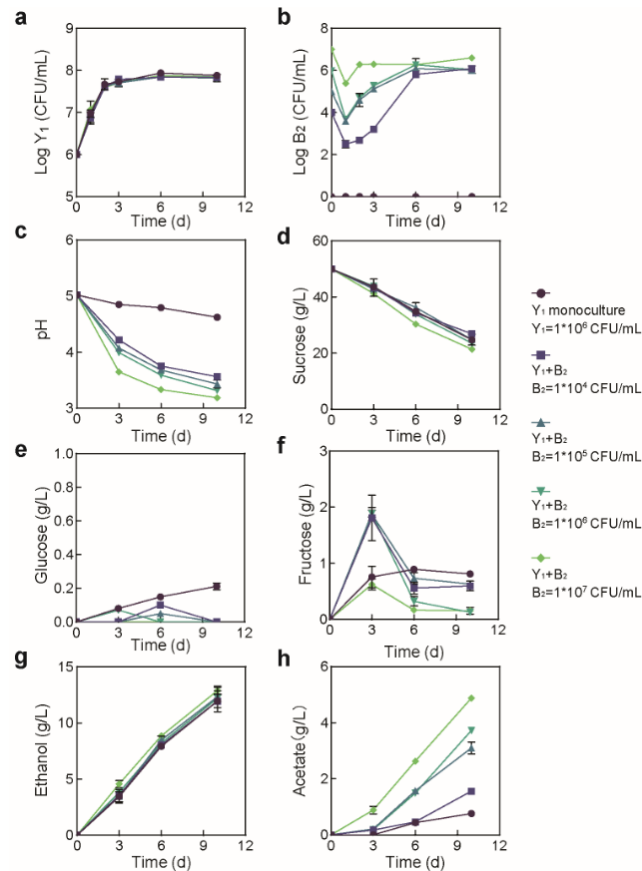

65

66 **Supplementary Figure 5. Population dynamics and metabolic profiles of the**  
67 **fermentations involving fixed Y<sub>1</sub> and varied B<sub>2</sub> initial abundances. a** Y<sub>1</sub> population  
68 dynamics. **b** B<sub>2</sub> population dynamics. **c-h** pH, carbon sources and metabolites during the  
69 fermentation. The initial Y<sub>1</sub> inoculation was fixed as 1\*10<sup>6</sup> CFU/mL but the B<sub>2</sub> inoculation  
70 was varied from 0 to 1\*10<sup>4</sup>, 1\*10<sup>5</sup>, 1\*10<sup>6</sup> and 1\*10<sup>7</sup> CFU/mL. Bars and error bars  
71 correspond to means and s.d. respectively.

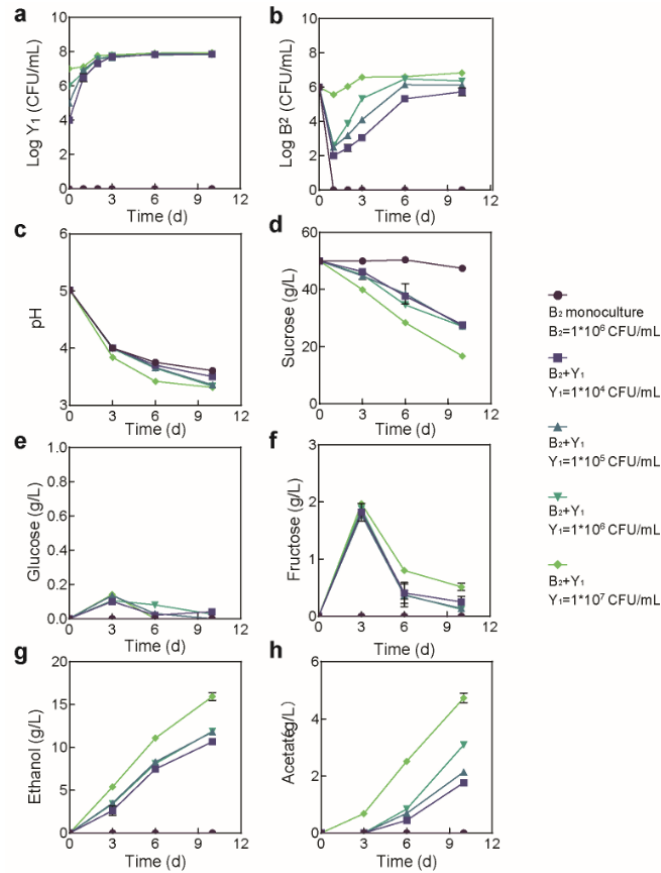

72

73 **Supplementary Figure 6. Population dynamics and metabolic profiles of the**

74 **fermentations involving fixed B<sub>2</sub> and varied Y<sub>1</sub> initial abundances. a** Y<sub>1</sub> population

75 **dynamics. b** B<sub>2</sub> population dynamics. **c-h** pH, carbon sources and metabolites during the

76 **fermentation. The initial B<sub>2</sub> inoculation was fixed as 1\*10<sup>6</sup> CFU/mL but the Y<sub>1</sub> inoculation**

77 **was varied from 0 to 1\*10<sup>4</sup>, 1\*10<sup>5</sup>, 1\*10<sup>6</sup> and 1\*10<sup>7</sup> CFU/mL. Bars and error bars**

78 **correspond to means and s.d. respectively.**

79

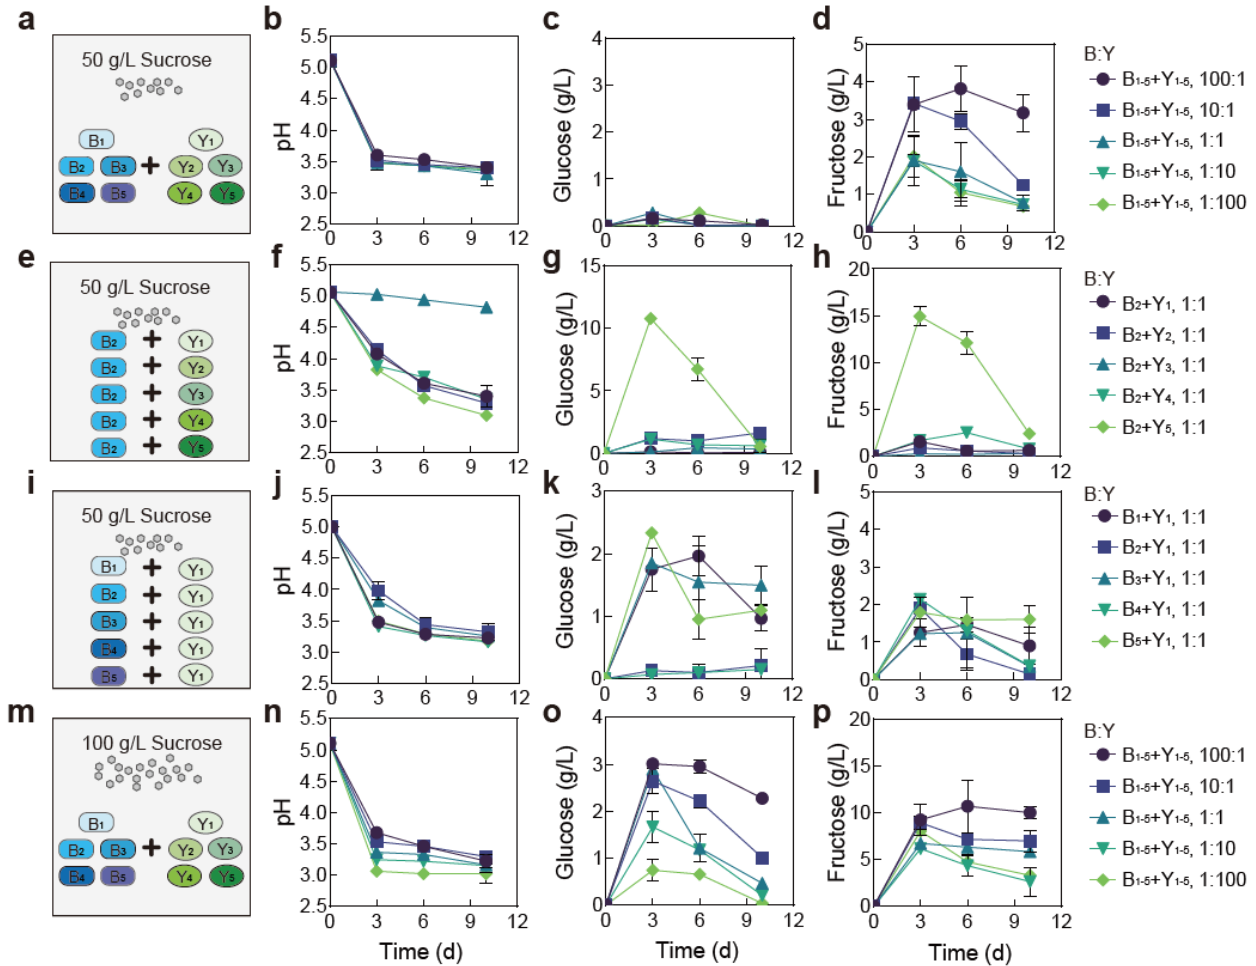

80

81 **Supplementary Figure 7. Fermentation by synthetic communities with increased**  
 82 **complexity and altered conditions.** **a** Schematic illustration of a ten-species community  
 83 involving B<sub>1</sub>-B<sub>5</sub> and Y<sub>1</sub>-Y<sub>5</sub> in a fermentation with 50 g/L of initial sucrose. **b-d** pH (**b**),  
 84 glucose (**c**) and fructose (**d**) throughout the course of the fermentation shown in **a**. **e**  
 85 Schematic illustration of 5 two-species communities with each involving B<sub>2</sub> and one of the yeasts  
 86 (Y<sub>1</sub>-Y<sub>5</sub>) in a fermentation starting with 50 g/L sucrose. **f-h** pH, glucose and fructose during the  
 87 fermentation illustrated in **e**. **i** Schematic illustration of 5 two-species communities with each  
 88 involving Y<sub>1</sub> and one of the bacteria (B<sub>1</sub>-B<sub>5</sub>) in a fermentation with 50 g/L of initial sucrose. **j-l** pH,  
 89 glucose and fructose during the fermentation illustrated in **i**. **m** Schematic illustration of  
 90 the ten-species community involving B<sub>1</sub>-B<sub>5</sub> and Y<sub>1</sub>-Y<sub>5</sub> in a fermentation starting with 100  
 91 g/L sucrose. **n-p** pH, glucose and fructose during the fermentation depicted in **m**. Bars  
 92 and error bars correspond to means and s.d. respectively.



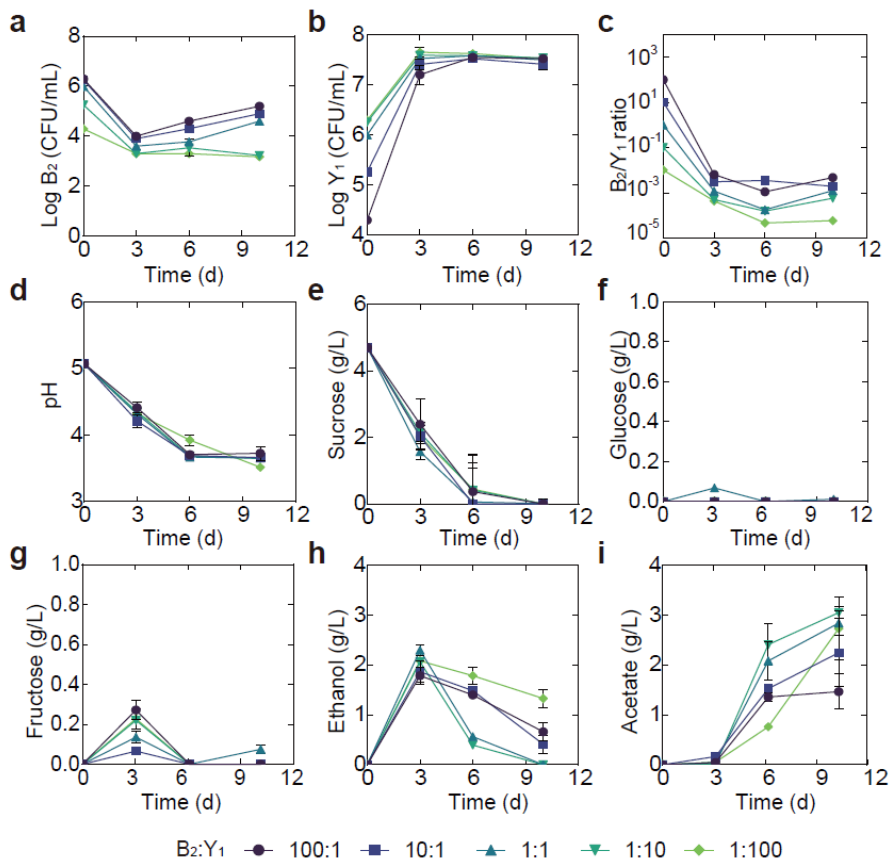

93

94 **Supplementary Figure 8. Temporal compositional and metabolic dynamics of the**  
95 **minimal core ( $B_2Y_1$ ) during a fermentation with 5 g/L of initial sucrose. a, b  $B_2$  (a)**  
96 **and  $Y_1$  (b) population dynamics throughout the fermentation c The  $B_2$ -to- $Y_1$  ratio in the**  
97 **fermentation. d-i pH, carbon sources and metabolites throughout the course of the**  
98 **fermentation. Bars and error bars correspond to means and s.d. respectively.**

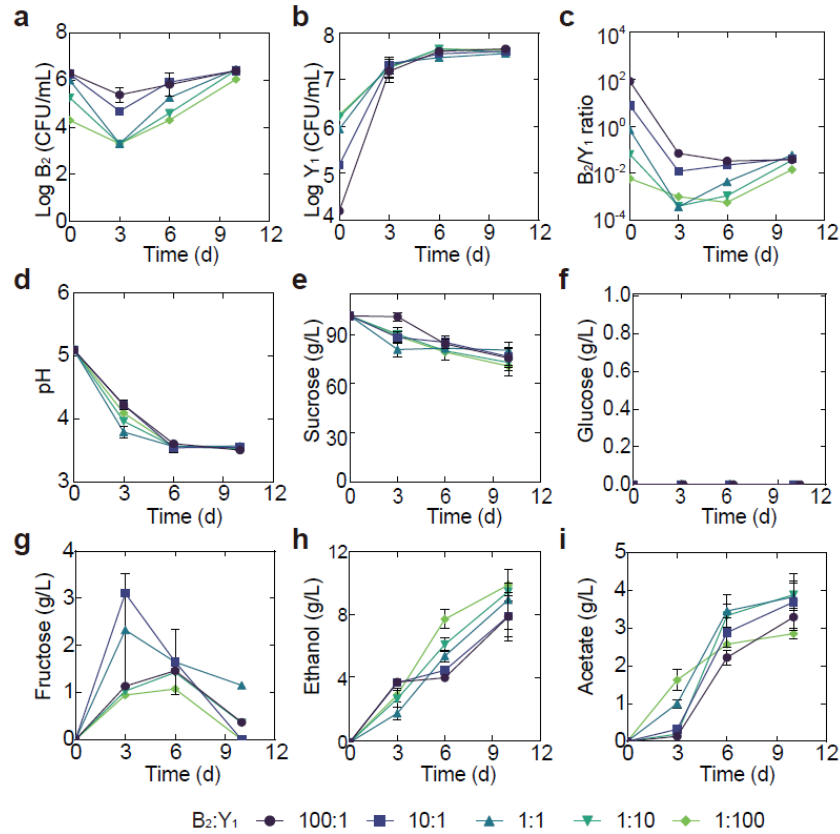

100 **Supplementary Figure 9. Temporal compositional and metabolic dynamics of the**  
101 **minimal core ( $B_2Y_1$ ) during a fermentation with 100 g/L of initial sucrose. a, b  $B_2$  (a)**  
102 **and  $Y_1$  (b) population dynamics during the fermentation. c The  $B_2$ -to- $Y_1$  ratio in the**  
103 **fermentation. d-i pH, carbon sources and metabolites during the fermentation driven by**  
104 **the core. Bars and error bars correspond to means and s.d.**
